1     **Fluorescent tagging of *Plasmodium* circumsporozoite protein allows**  
2     **imaging of sporozoite formation but blocks egress from oocysts**

3

4

5     Mirko Singer<sup>1,2,#</sup>, and Friedrich Frischknecht<sup>1,#</sup>

6

7

8             <sup>1</sup>Integrative Parasitology, Center for Infectious Diseases, Heidelberg University

9     Medical School, Im Neuenheimer Feld 344, 69120 Heidelberg, Germany

10

11             <sup>2</sup>Experimental Parasitology, LMU München, Lena-Christ Strasse 48, 82152

12     Planegg-Martinsried, Germany

13

14

15

16     #to whom correspondence should be addressed:

17             mirko.singer@lmu.de

18             freddy.frischknecht@med.uni-heidelberg.de

19             phone: +49-6221-566537     fax: +49-6221-564643

20

21

22

## 23 **Abstract**

24 The circumsporozoite protein, CSP is the major surface protein of *Plasmodium*  
25 sporozoites, the form of malaria parasites transmitted by mosquitoes. CSP is involved  
26 in sporozoite formation within and egress from oocysts, entry into mosquito salivary  
27 glands and mammalian liver as well as migration in the skin. Antibodies against CSP  
28 can stop infection prior to the first round of parasite replication in the liver. CSP consists  
29 of different domains and is proteolytically cleaved prior to hepatocyte invasion. Part of  
30 CSP has been developed into a licensed vaccine against malaria. Yet, how CSP  
31 facilitates sporozoite formation, oocyst egress and hepatocyte specific invasion is still  
32 not fully understood. Here, we generated a series of parasites expressing full-length  
33 versions of CSP as fusion proteins with the green fluorescent protein. This enabled the  
34 investigation of sporozoite formation in living oocysts and revealed a dominant  
35 negative function of some GFP-CSP fusions during sporozoite egress.

36

## 37 **Introduction**

38 Transmission of malaria occurs when *Plasmodium* sporozoites are inoculated  
39 into the skin during the probing phase of a mosquito bite, before the mosquito starts to  
40 suck up blood. These sporozoites are formed in parasitic oocysts at the midgut wall of  
41 mosquitoes, egress from oocysts to access the hemolymph, the circulatory liquid of the  
42 mosquito, and enter into salivary glands. Here they await transmission within the  
43 salivary cavities and canals (Frischknecht et al., 2017). Within the skin, sporozoites  
44 migrate rapidly and enter both blood and lymph vessels (Amino et al., 2006). Those  
45 entering the blood stream are transported with the circulation and arrest specifically in  
46 the liver to exit the blood stream and enter hepatocytes, where a liver stage develops  
47 that gives rise to thousands of red blood cell infecting merozoites (Prudencio et al.,  
48 2006; Cerami et al., 1992). Many of these steps depend on the GPI (glycosyl-  
49 phosphatidyl-inositol)-anchored major surface protein CSP (circumsporozoite protein).  
50 Antibodies against CSP can lead to a block in migration in the skin (Aliprandini et al.,  
51 2018) and reduction of liver cell invasion (Kisalu et al., 2018; Murugana et al., 2020).  
52 Part of CSP has been used to develop the only licensed malaria vaccine RTS,S AS01,  
53 Mosquirix (Casares, Brumeanu & Richie, 2010).

54 Deletion of *csp* blocks sporozoite formation as *csp(-)* sporozoites fail at an early  
55 step of sporozoite budding from the plasma membrane of the sporoblast (Menard et al.,  
56 1997). Reducing *csp* expression still allows for sporozoite formation, yet those parasites



57 are misshaped and noninfectious (Thathy et al., 2002). CSP contains a signal peptide  
58 followed by an N-terminal domain, a repeat region and an adhesive thrombospondin  
59 repeat (TSR) and is C-terminally anchored to GPI. In the rodent malaria model parasite  
60 *Plasmodium berghei*, deletion of the N-terminus leads to a drop in salivary gland  
61 invasion and infection of cells within the skin, where a live-stage like parasite can  
62 directly produce merozoites (Coppi et al., 2011). Deletion of the repeat region does  
63 initially not affect sporozoite formation but leads to defects in sporozoite maturation  
64 causing sporozoite death prior to oocyst egress (Ferguson et al., 2014). Deletion of both,  
65 the N-terminal domain and repeat region leads to a severe defect in sporozoite budding  
66 possibly because forming sporozoites fail to separate their plasma membrane from  
67 others (Ferguson et al., 2014). Mutations within the region II+ at the 5' end of the TSR  
68 of CSP lead to fully formed sporozoites that fail to egress and can also not enter into  
69 liver cells (Wang, Fujioka & Nussenzweig, 2005). Deletion of the GPI-anchor or  
70 replacement of the GPI-anchor with a transmembrane domain led to a similar strong  
71 effect on sporozoite formation as deletion of *csp* (Wang, Fujioka & Nussenzweig, Cell  
72 Microbiol, 2005).

73 To enable real time imaging experiments to better understand CSP function we  
74 aimed at generating a functional fusion protein of CSP with the green fluorescent  
75 protein GFP. Visualization of parasite formation in real time has been achieved by  
76 fluorescent light microscopy through GFP-tagging of the plasma membrane P-type  
77 ATPase PfATP4 and the putative sphingomyelin synthetase PfSMS1 for the blood  
78 stage and plasma membrane protein PMP1 for all replicating stages (Rottmann et al.,  
79 2010; Kono et al., 2016; Burda et al., 2017). Here we generated a series of parasites  
80 expressing versions of CSP “internally” fused to GFP for the investigation of CSP-  
81 localization during *Plasmodium berghei* sporozoite formation. This showed that CSP  
82 could be successfully tagged and localized to the surface when GFP was introduced  
83 either between the repeat region and TSR or between the TSR and GPI-anchor. Both  
84 GFP-fusion proteins allowed full sporozoite formation yet sporozoite egress from the  
85 oocysts was blocked. Intriguingly, introducing GFP after the signal peptide led to the  
86 early cleavage of GFP and did not result in a surface localized fusion protein. In  
87 addition, expressing GFP with a GPI-anchor allowed sporozoite egress and  
88 colonization of salivary glands.

89

## 90 **Results**

### 91 **Generation of multiple GFP-CSP fusion proteins**

92 We previously tagged the sporozoite protein TRAP (thrombosponin related  
93 anonymous protein) successfully after the signal peptide (Kehrer et al., 2016), while  
94 similar tagging of the sporozoite protein TRP1 (thrombospondin related protein 1)  
95 failed to give a functional fusion protein (Klug and Frischknecht, 2017). Considering  
96 the multiple functions of the different CSP domains, we thus selected several locations  
97 for insertion of the *gfp* sequence into the *csp* gene (Figure 1A, Figure S1). Owing to  
98 different transfection strategies we generated the following five parasite lines: GFP-  
99 GPI, parasites expressing a protein consisting of the signal peptide of CSP, GFP and  
100 the C-terminal 22 amino acids of CSP corresponding to the GPI-anchor sequence. This  
101 line was obtained through insertion at a silent locus in chromosome 12 of *P. berghei*  
102 strain ANKA (Singer et al., 2015) (Figure 1B, Figure S2). SP-GFP-CSP\_add, parasites  
103 expressing a CSP-GFP fusion protein with the GFP placed between the signal peptide  
104 (SP) and the N-terminus of CSP. This line, expressed SP-GFP-CSP in addition to the  
105 endogenous CSP and was obtained by linear insertion of the *sp-gfp-csp* plasmid into  
106 the *csp* locus on chromosome 4 (Figure 1A, B, Figure S2). SP-GFP-CSP\_rep, where  
107 the endogenous *csp* was replaced by the *sp-gfp-csp* gene. R-GFP-CSP, where the GFP  
108 was placed between the repeat region and TSR of CSP and TSR-GFP-CSP; where the  
109 GFP was placed between the TSR and the GPI-anchor. Exact positioning of the GFP  
110 insertion sites for R-GFP-CSP and TSR-GFP-CSP was assisted by the crystal structure  
111 of the TSR domain (Doud et al., 2012). In these lines, the fusion proteins were also  
112 expressed in addition to the endogenous CSP as obtained by linear insertion of the  
113 respective plasmids into the *csp* locus on chromosome 4 (Figure 1A, B, Figure S2).  
114 Note that for SP-GFP-CSP\_add, the DNA is inserted such that the resulting modified  
115 locus features an endogenous *csp* with a truncated 3'UTR and the fluorescent copy a  
116 truncated 5'UTR, while this is inversed for R-GFP-CSP and TSR-GFP-CSP (Figure  
117 1B). For SP-GFP-CSP\_rep, the gene is flanked by the complete 5'UTR and 3'UTR.

118 All lines were readily obtained and generated comparable number of oocysts  
119 and midgut sporozoites as wild type parasites, yet some lines showed no sporozoite  
120 accumulation in the salivary gland (Table 1). Investigating the GFP-CSP localization  
121 revealed that all but the two SP-GFP-CSP lines showed the expected surface  
122 localization of the fusion proteins (Figure 1C). Close inspection also revealed that the  
123 GPI-GFP expressing parasite often showed additional small vesicular localization in

124 the proximity of the plasma membrane at the estimated nuclear exit site or Golgi  
125 localization (Figure 1C, Figure 7).

126

### 127 **Processing of GFP-CSP fusion proteins**

128 To investigate if the fused proteins were indeed GFP-CSP fusions we examined  
129 western blots with antibodies against GFP and the repeats of CSP (Figure 2A). The  
130 anti-repeat antibodies recognized the known CSP double bands in GFP-GPI and SP-  
131 GFP-CSP parasite lines corresponding to the full-length protein and one lacking the N-  
132 terminus (Coppi et al., 2011). In contrast, the same antibodies recognized two additional  
133 higher bands in the R-GFP-CSP and TSR-GFP-CSP parasite lines suggesting that the  
134 latter two contain full length GFP-CSP fusion proteins as well as the N-terminally  
135 cleaved CSP-GFP version (Figure 2A and B). The anti-GFP antibody revealed two  
136 bands in parasites expressing GFP-GPI, indicative of the presence of both soluble GFP  
137 (low band) and GPI attached (higher band) forms or two forms of GFP-GPI that migrate  
138 at slightly different height. In the SP-GFP-CSP line no full length CSP-GFP could be  
139 detected with either anti-GFP or anti-repeat antibodies. A large GFP band was observed  
140 with a minor band just on top suggesting that GFP is cleaved very early after protein  
141 synthesis. In the R-GFP-CSP parasite line a major 37 kDa band could be detected with  
142 the anti GFP antibody suggesting the presence of a fusion protein including the GFP  
143 and the TSR. Also, a faint band was detected at 70 kDa, likely corresponding to GFP-  
144 CSP protein lacking the N-terminus as revealed by the anti CSP antibody (Figure 2A).  
145 For the TSR-GFP-CSP parasites anti-GFP antibodies identified multiple bands  
146 suggesting that some full length GFP-CSP protein is present but that proteolytic  
147 processing leads to multiple GFP-CSP species in these parasites (Figure 2B).

148

### 149 **Formation of sporozoites proceeds like in wild type parasites**

150 We next investigated sporozoite formation by electron microscopy. This  
151 showed that all parasite lines developed normally in a manner reminiscent of wild type  
152 parasites (Figure 3A, B). Bud formation started after the nuclei aligned near the plasma  
153 membrane and coincided with the appearance of the thick pellicle due to the formation  
154 of the inner membrane complex during budding (Terzakis, Sprinz & Ward, 1966;  
155 Terzakis, Sprinz & Ward, 1967; Ferguson et al., 2014). Early sporozoite buds showed  
156 the typical round large vesicular rhoptry Anlagen. Sporozoites elongated thereafter and  
157 showed the typical elongated rhoptries, micronemes and microtubules. Finally, in all

158 stages fully formed sporozoites could be detected in late stage oocysts (Figure 3A, B).  
159 We also noticed the labyrinthine structures, which represent a highly organized  
160 membranous structure that increase the surface area of the plasma membrane. Some of  
161 these also contain visible internal membranes (Figure 3C) (Wong and Desser, 1976;  
162 Meis, Verhave, Jap & Neuwissen, 1985).

163

#### 164 **Motility of midgut sporozoites**

165 Midgut sporozoites show only a weak capacity for surface adhesion which is a  
166 necessity for gliding motility (Vanderberg, 1974; Hegge et al., 2010; Hegge et al.,  
167 2012). Hence few midgut sporozoites are usually observed actively migrating on a  
168 substrate. Yet, sporozoites residing for longer than wild type parasites within the  
169 oocysts increase their capacity to glide (Klug and Frischknecht, 2017; Aly and  
170 Matuschewski, 2005) possibly reflecting a continued maturation process (Sato,  
171 Montagna & Matuschewski, 2014; Silva et al., 2016). We found that sporozoites from  
172 most lines were attaching more robustly at day 25 post infection than wild type  
173 sporozoites (Figure 4A). Typical back-and-forth movement termed patch-gliding  
174 (Münter et al., 2009) of hemolymph sporozoites was most frequently observed in GFP-  
175 GPI and SP-GFP-CSP\_add parasites, while R-GFP-CSP sporozoites were gliding in  
176 the most robust manner. With over 20% gliding midgut sporozoites this reached the  
177 levels of hemolymph sporozoites (Münter et al, 2009; Klug et al., 2020). Over 10% of  
178 TSR-GFP-CSP sporozoites were also gliding. SP-GFP-CSP\_rep parasites showed a  
179 motility pattern most similar to wild type, but with increased adhesion. These data  
180 suggested to us that R-GFP-CSP and SP-GFP-CSP\_rep midgut sporozoites might be  
181 infective for liver cells. Strikingly, however, when we injected 500.000 R-GFP-CSP  
182 and 500.000 or one million SP-GFP-CSP\_rep midgut sporozoites intravenously into  
183 mice, none developed a blood stage infection, while three out of four mice become  
184 blood stage patent after injection of 500.000 wild type midgut sporozoites (Figure 4B).  
185 This suggests, that like in the region II+ mutation (Wang et al, 2005), our GFP-CSP  
186 lines are not capable to enter liver cells.

187

#### 188 **R-GFP-CSP and TSR-GFP-CSP but not SP-GFP-CSP localize to the plasma** 189 **membrane**

190 Investigation of the fluorescence signal during sporozoite formation using  
191 spinning disc confocal microscopy of acutely dissected mosquito guts showed that the

192 fluorescent signal of all parasite lines with the exception of the two SP-GFP-CSP lines  
193 could be found at the plasma membrane of the oocyst, delineating the invagination of  
194 the plasma membrane, a process that precedes sporozoite formation (Figure 5). In the  
195 SP-GFP-CSP lines the signal was not found at the plasma membrane but was also  
196 distinct from cytoplasmic GFP. It likely stays within a membrane-delimited  
197 compartment and in early oocysts looks very similar to the endoplasmic reticulum  
198 accumulation observed in liver stages (Kaiser et al., 2016) (Supplementary movie S1).  
199 In late oocysts, whirl like accumulations of unclear origin are observed within the  
200 sporoblast center, which could correspond to a specialized organization of the  
201 endoplasmic reticulum (Figure 6, Supplementary movie S2). Later in sporozoite  
202 formation, the induction of plasma membrane curvature of budding sporozoites was  
203 readily observable in the R-GFP-CSP, TSR-GFP-CSP and GFP-GPI expressing  
204 parasites (Figure 6, Supplementary movie S3). Sporozoite budding could be followed  
205 until sporozoite formation was complete. In TSR-GFP-CSP the plasma membrane was  
206 strongly stained but weak GFP fluorescence was also observed from the ER, potentially  
207 from slowed or delayed trafficking (Figure 6, Supplementary movie S4).

208 In all lines but the two SP-GFP-CSP ones strong fluorescence accumulations  
209 could be detected in literally all imaged cysts, albeit not in every optical section (Figure  
210 6, Supplementary movies S3-5). In contrast to the ER accumulations observed in SP-  
211 GFP-CSP\_rep that were observed earlier, these signals were only observed with the  
212 onset of apical tip formation, mostly bridging two sporoblasts. They likely represent  
213 the highly convoluted membranous structures previously named labyrinthine structures  
214 (Meis, Verhave, Jap & Neuwissen, 1985). Their apparent diameter in the fluorescent  
215 images was around 1-5  $\mu\text{m}$  (n=53), while those in the EM images measured from 0.5-  
216 4  $\mu\text{m}$  (n=13). In two dimensions, these structures are sponge like in appearance by EM  
217 (Figure 3). Roughly 50-70% of the volume is cytoplasmic content and internal  
218 membranous structures, the rest extracellular volume. The distance between opposing  
219 plasma membranes is between 200-400 nm, and in some instances the substructures  
220 represent a short comb. Finally, in all parasite lines fully developed sporozoites could  
221 be detected. Sporozoites in fully matured oocysts labelled similar to those found in  
222 isolated sporozoites (Figure 7 – compare with Figure 1C, Supplementary Movie S6).  
223 In late oocysts of the SP-GFP-CSP\_rep line a number of unusual structures were found  
224 with the GFP signal appearing localized to a membranous structure. In these oocysts  
225 few normal sporozoites could be detected, suggesting that less cytoplasmic material

226 could be converted into sporozoites (Figure 7, Supplementary Movie S2). This in turn  
227 might also explain why midgut sporozoites of this line were not infectious if injected  
228 into mice (Figure 4B).

229

### 230 **Microtubules appear after initial bud formation during early sporogony**

231 We recently succeeded in labeling microtubules with SiR-tubulin within  
232 oocysts (Spreng et al., 2019). SiR tubulin intercalates with microtubules and only then  
233 becomes fluorescent, hence allowing selective staining of microtubules in live cells  
234 (Lucinavicius et al., 2014). Using this dye in combination with our parasite lines and  
235 Hoechst for labeling of nuclei showed that microtubules were absent from oocysts with  
236 smooth invaginated plasma membrane even if nuclei were already recruited to the  
237 periphery (Figure 8A, B, first row). Only in oocysts with signs of early apical bud  
238 formation could we detect microtubules, suggesting that they only form after the  
239 initiation of sporozoite budding (Figure 8).

240

### 241 **Discussion**

#### 242 **Oocyst egress is blocked in all fusions but SP-GFP-CSP and GFP-GPI.**

243 We generated a series of *P. berghei* parasite lines expressing different fusions  
244 of the green fluorescent and circumsporozoite proteins. We designed these as internal  
245 GFP fusions with the GFP placed between known domains of CSP. We hoped that one  
246 of these would allow normal progression of sporozoites along their long journey from  
247 formation in the oocyst to de-differentiation in hepatocytes. While the generated lines  
248 allowed observation of sporozoite formation, they either cleaved off the GFP if placed  
249 right after the signal peptide, or arrested after maturation within oocysts. The latter,  
250 literally dominant negative impact of the fusion protein might indicate that the function  
251 of CSP in oocyst egress (Wang et al., 2005) is compromised by the presence of the  
252 bulky GFP. Although it is not clear how CSP mediates sporozoite egress it is possible  
253 that it needs to be proteolytically cleaved and that hence processing is modulated in the  
254 GFP-CSP fusions. This could also explain why midgut-derived CSP-GFP sporozoites  
255 are not infective for rodent livers, where processing of CSP was shown to be induced  
256 (Coppi et al., 2011). Alternatively, removal of the GPI-anchor by phospholipases might  
257 also be blocked by the GFP (Hereld et al., 1986). Indeed, our western blots detect many  
258 different bands which cannot easily be accounted for but hint towards complex  
259 functions of the protein. But why do SP-GFP-CSP\_rep mutants not get out of the



260 oocysts? In these mutants all CSP is generated as GFP-fusion, but the GFP is cleaved  
261 before CSP arrives at the plasma membrane. Yet these sporozoites do not egress. Post  
262 signal peptide N-terminal processing of CSP might be due to the two N-terminal  
263 PEXEL motifs found in CSP (Figure S1) (Singh et al., 2007). However it would be  
264 expected that a PEXEL motif after GFP would not be recognized, at least indicated by  
265 PEXEL motif processing in *Plasmodium falciparum* bloodstages (Hiss et al., 2008).  
266 This would result in a modified N-terminus of SP-GFP\_CSP\_rep compared with CSP  
267 WT. Clearly more work is needed to understand the possibly many different cleavage  
268 events necessary for CSP function.

269

### 270 **Trafficking of CSP**

271 The observation by fluorescence microscopy that GFP accumulates within  
272 internal structures in the SP-GFP-CSP sporozoites and the nearly complete cleavage of  
273 this fusion protein as determined by Western blot, suggests that GFP is cleaved off  
274 already within the ER or only shortly after. Intriguingly, in sporozoites showing CSP-  
275 GFP fusions at the PM, the protein is almost exclusively found at the PM. This is in  
276 contrast to GFP-TRAP, which is stored in micronemes (Kehrer et al., 2016). These  
277 observations hint that CSP is trafficked differently prior to GFP maturation, i.e. not  
278 within micronemes and faster than TRAP. Interestingly, the short fusion protein of GFP  
279 and the GPI-anchor of CSP shows some internal labeling (Figure 1C) that is different  
280 in localization to the apically located GFP-TRAP (Kehrer et al., 2016) and within the  
281 proximity of the ER exit site and Golgi. In direct comparison on trafficking, R-GFP-  
282 CSP is always detected only at the PM, whereas TSR-GFP-CSP showed a faint  
283 fluorescence within the ER of oocysts (Figure 6). This indicates that the presence of  
284 GFP directly adjacent to the GPI-anchor might slightly interfere with trafficking,  
285 especially if the GPI-anchor itself is the signal for trafficking as is the case in  
286 *Trypanosoma brucei* (Kruzel, Zimmet 3rd & Bangs, 2017; Triggs and Bangs, 2003).  
287 Comparing the relative intensity of the full length bands with the multiple smaller bands  
288 detected with anti-GFP antibody suggests that a substantial fraction of R-GFP-CSP as  
289 well as TSR-GFP-CSP protein is not full length. Our data does not allow to conclude  
290 whether the protein is processed en route or only after it appears on the surface, but the  
291 fact that no internal structures are labelled in this parasite line would favor processing  
292 upon arrival at the PM.

293

294 **Labyrinthine structures**

295 In almost every section of every oocyst observed with EM we found labyrinthine  
296 structures, which are small prior to the start of sporozoite budding and most prominent  
297 during sporozoite budding and disappear/disintegrate once sporozoite elongation is  
298 completed. Although we did not perform correlative microscopy here, several  
299 observations suggest that the bright fluorescent dots in GFP-GPI, R-GFP-CSP and TSR-  
300 GFP-CSP correspond to labyrinthine structures. First, their size is similar in both EM and  
301 fluorescence microscopy. Secondly, we could not observe any fluorescence dots in the SP-  
302 GFP-CSP parasite lines. Thirdly, their time of appearance and localization at the proximity  
303 of sporoblasts match between EM and fluorescence microscopy. But what are their  
304 function?

305 The strong fluorescent intensity of the labyrinthine structures in comparison to  
306 the PM of oocysts suggests that the main membrane component is PM that accumulates  
307 at high density. Indeed, EM shows a highly convoluted layer of membranes (Figure 3C).  
308 EM also shows an internal membrane network. The origin of this is completely unknown.  
309 Structures with very similar appearance have been observed previously before merozoite  
310 formation in liver schizonts, and proposed to be involved in nutrient uptake (Meis et al.,  
311 1985). Structures which are similar to the rather degenerate labyrinthine structures  
312 observed in old oocysts of TSR-GFP-CSP oocysts have been described in oocysts of  
313 *Leucocytozoon dubreuli* as ER-associated vesicles (Wong et al, 1976). In the parasites  
314 lacking the CSP repeats degraded labyrinthine structures could also be observed, but  
315 these were not commented on by the authors (Ferguson et al, 2014). However, we did  
316 not observe any labyrinthine structures prior to sporoblast development by PM  
317 invagination. This makes the function as a general nutrient uptake area less likely as  
318 nutrients are likely most needed during the growth of oocysts. Yet, nutrient uptake  
319 might be blocked by the formation of the IMC and hence these structures are established  
320 before the entire PM is covered with IMC during sporozoite formation. Additionally or  
321 alternatively, this structure could be involved in the secretion of CSP itself. However  
322 CSP is secreted prior to appearance of the labyrinthine structures. In trypanosomes,  
323 endocytic recycling of the GPI-anchored protein VSG has been described in detail  
324 (Engstler et al., 2004). Potentially these structures are involved in protein sorting by  
325 size, where the short membrane form is replaced by the full length CSP detected in  
326 salivary gland sporozoites. If protein size is the main sorting mechanism, this could also  
327 give another explanation why this fails in GFP-CSP fusions. Another study has recently  
328 been performed on a PM localized transmembrane protein that has been tagged with



329 GFP (Burda et al., 2017) but it is not clear if this also localizes to the labyrinthine  
330 structures.

331

### 332 **Towards 4D imaging of oocysts in mosquitoes**

333         Recent advances in light microscopy enable imaging of complex and large  
334 structures in 3D over time (4D). The use of confocal microscopy as shown here could  
335 in principle be extended to live imaging by repeatedly imaging oocysts. Combining  
336 plasma membrane labels with nuclear or organelle-specific labelling could hence allow  
337 the visualization of sporozoite formation and answer questions such as whether  
338 organelle packaging is highly spatially or temporally coordinated or even whether the  
339 organelles are somehow coupled to each other. Furthermore, the use of truncated  
340 proteins fused with GFP could yield insights into where these proteins function during  
341 sporogony. Two studies along these lines have shown that variations of CSP or tubulin  
342 protein expression levels can hamper sporozoite formation and impact their form,  
343 motility and infectivity (Thathy et al., 2002; Spreng et al., 2019). Here we used SiR  
344 tubulin to show that microtubules only form once sporozoite bud formation has  
345 proceeded in fixed images (Figure 8). Using 4D microscopy should allow to determine  
346 the precise timing.

347

348 In conclusion, we generated a series of parasite lines expressing different fusion  
349 proteins of GFP and CSP. This showed that only internal GFP-tagging allowed the  
350 detection of GFP-CSP fusion proteins at the plasma membrane. The introduced  
351 additional copies of correctly localized GFP-CSP fusion proteins stopped egress from  
352 oocysts. Hence to enable imaging of CSP in sporozoites during transmission from  
353 mosquito to mammal these GFP-CSP fusion proteins should be expressed from a  
354 promoter that is active only after sporozoites entered salivary glands. The observation  
355 that some GFP-CSP fusion proteins were not full-length suggest complex processing to  
356 occur, some of which is likely interfered with by the generated fusions.

357

### 358 **Methods**

359

360 Animal work

361 All mice experiments were performed according to the FELASA and GV-SOLAS  
362 standard guidelines and were approved by the German authorities

363 (Regierungspräsidium Karlsruhe). Parasite generation and maintenance was performed  
364 in NMRI mice and sporozoite injections were performed with female C57BL/6 mice  
365 (both from Charles River).

366

#### 367 Bioinformatics

368 All genetic sequences were retrieved from PlasmoDB (<https://plasmodb.org/plasmo/>,  
369 release 6.4-30) and GeneDB ([www.genedb.org/Homepage](http://www.genedb.org/Homepage)) (Aurrecochea et al, 2008;  
370 Logan-Kumpler et al, 2012). Sequence alignments were performed with clustalW2  
371 (<https://www.ebi.ac.uk/Tools/msa/clustalw2/>) and CLC Workbench 7.9.1 (CLC bio,  
372 Qiagen bioinformatics, USA) and manually curated. Signal peptide prediction was  
373 performed with Signal IP 4.1 (<http://www.cbs.dtu.dk/services/SignalP/>), GPI-anchor  
374 prediction was performed with PredGPI (<http://gpcr.biocomp.unibo.it/predgpi/>)  
375 (Petersen, Brunak, von Heijne & Nielsen, 2011; Pierleoni, Marelli & Casadio, 2008).  
376 Plasmid design was performed with ApE v2.0.45 (<https://www.thejorgensenlab.org/>).

377

#### 378 Generation of parasite lines

379 Mapping of the exact position for internal GFP tagging was performed upon sequence  
380 alignment and predicting the signal peptide cleavage site and GPI-anchor prediction  
381 (Figure S1). Primers were obtained from Thermo Fischer Scientific (For sequences see  
382 Figure S3), restriction enzymes from New England Biolabs. All required *Plasmodium*  
383 sequences were amplified from genomic DNA from *Plasmodium berghei* strain ANKA  
384 with high fidelity Taq polymerase (Thermo Fischer Scientific, Waltham, USA) with 8  
385 °C lowered elongation temperature and verified by Sanger sequencing (GATC; now  
386 Eurofins, Konstanz) upon cloning.

387 For generation of GFP-GPI, the promoter region including the SP was amplified with  
388 primers P208 and P268, and cloned via EcoRI and NdeI into Pb238 (Singer et al., 2015).  
389 Then the GPI-anchor sequence as well as a short 3'UTR was amplified with P274 and  
390 P270 and cloned via KasI and EcoRV. The resulting vector was digested with PvuI and  
391 integrated via double crossover into a silent chromosome 12 locus (Figure 1B).

392 For interdomain tags, the promoter region up to the respective *gfp* insertion site was  
393 amplified with P208;P268 for SP-GFP-CSP, P208;P271 for R-GFP-CSP and  
394 P208;P273 for TSR-GFP-CSP and cloned via EcoRI and NdeI into Pb238. The  
395 remaining piece of *csp* with the 3'UTR was amplified with P269;P270 for SP-GFP-  
396 CSP, P272;P270 for R-GFP-CSP and P274;P270 for TSR-GFP-CSP and cloned via

397 KasI and EcoRV. Constructs were linearized with PacI (SP-GFP-CSP), PmlI (R-GFP-  
398 CSP and TSR-GFP-CSP) and integrated via single crossover into the *csp* locus (Figure  
399 1B).

400 Transfection was performed in *P. berghei* strain ANKA as published (Janse, Ramesar  
401 & Waters, 2006). Transgenic parasites were selected with pyrimethamine via the  
402 drinking water (0.07 mg/ml) in NMRI mice. Upon successful initial genotyping,  
403 parasites were cloned by limiting dilution of 0.7 parasites injected *i.v.* into 10 NMRI  
404 mice. All generated clones were genotyped again.

405 For genotyping, 5' integration and 3' integration was probed with P134;P210 P137;P99  
406 (GFP-GPI), P267;P210 P893;P882 (SP-GFP-CSP, R-GFP-CSP, TSR-GFP-CSP) and  
407 P267;P210 P234;P882 (SP-GFP-CSP\_rep). The whole locus was amplified with  
408 P134;P137 (GFP-GPI) and P267;P882 (all others). Expected sizes are indicated in  
409 Figure S2. Note that the whole locus was not always obtained due to its large size.

410

#### 411 Mosquito work

412 *Anopheles stephensi* mosquitos (strain SDA 500) were infected as described previously  
413 (Frischknecht et al, 2004). Parasite development was monitored from day 10 post  
414 infection by dissection. Mosquitoes were washed in 70% ethanol and stored in PBS and  
415 dissected under a Binocular Nikon SMZ 1500 with GFP illumination for preparation of  
416 midgut and salivary gland samples. For haemolymph preparation sporozoites were  
417 dissected 'dry': The last two segments of the abdomen were removed, the tip of a self-  
418 made glass capillary was inserted into the spiracle of the mesothorax and the  
419 haemolymph was rinsed with PBS. Subsequently the midgut and salivary glands were  
420 dissected from the same mosquito.

421

#### 422 Light microscopy

423 Imaging was performed on an inverted Axiovert 200 M microscope from Zeiss, a  
424 spinning disc confocal ERS-FRET from PerkinElmer using a Nikon inverted  
425 microscope or Leica SP5 confocal microscope. Gliding assays were performed in RPMI  
426 with 3% BSA. Sporozoites from midgut samples were purified using 17% Accudenz  
427 gradient centrifugation (Kennedy et al., 2012). For IFA, midguts were fixed in 4% PFA  
428 for 30 minutes, permeabilized ON with 0,5% Triton-X-100 with 3% BSA, incubated  
429 overnight with anti-Tubulin antibody. Secondary antibody Alexa Fluor 546 (Invitrogen,  
430 Karlsruhe, Germany) was incubated overnight together with Draq5 (Thermo Fischer

431 Scientific, Waltham, USA) to label DNA and washed 5 times for 20 minutes and  
432 mounted with Prolong Gold (Thermo Fischer Scientific, Waltham, USA).

433 Life cell microscopy of whole midguts was performed in RPMI with 3% BSA. For  
434 tubulin staining, midguts were incubated for 30 minutes with 1  $\mu$ M SIR-Tubulin  
435 (Spirochrome, Stein am Rhein, Switzerland) (Lukinavicius et al., 2013) as well as 1  
436  $\mu$ g/ml of Hoechst 33342 (Thermo Fischer Scientific, Waltham, USA), washed in fresh  
437 RPMI with 3% BSA and sealed with a 1:2:1 mixture of lanolin:paraffin:vaseline.

438

#### 439 Image processing

440 Image analysis was performed with FIJI (LOCI, Wisconsin-Madison, USA)  
441 (Schindelin et al., 2012). Figures were generated with Illustrator CS5.1 software  
442 (Adobe, München, Germany) and Photoshop CS 5.1 software (Adobe, München,  
443 Germany). Images shown in Figure 8 were deconvolved with Autoquant X3 software  
444 (Media Cybernetics). Multiple optical sections shown in Figure 5, 6 and 7 where  
445 contrast adjusted for each individual slice to improve structural information. If required,  
446 the intensity spectrum of the image was collapsed into 8 bit by square rooting the entire  
447 image.

448

#### 449 Western blotting

450 Dissected sporozoite samples were purified with 17% (w/v) Accudenz gradient  
451 centrifugation. Samples were lysed with freshly prepared ice-cold RIPA buffer with  
452 protease inhibitor (Roche, Mannheim, Germany) for one hour on ice. Samples were  
453 separated in 4-15% precast gels and transferred semi-dry using the BioRad Transblot  
454 turbo system. Samples were incubated with primary antibodies; anti-GFP antibody 13.1  
455 + 7.1 (Roche, Merck, Darmstadt, Germany) or anti-CSP repeat antibody – mAB 3D11  
456 (Yoshida et al., 1980) and HRP bound antibodies (GE healthcare, Thermo Fischer  
457 Scientific, Waltham, USA) and incubated with SuperSignal West Pico  
458 chemiluminescent solution (Thermo Fischer Scientific, Waltham, USA).

459

#### 460 Electron microscopy

461 Electron microscopy was performed at the Electron Microscopy Core Facility (EMCF)  
462 of Heidelberg University. Midguts were dissected directly into the fixation buffer and  
463 sample preparation was performed by the core facility technician Steffi Gold, using

464 classical chemical fixation. Primary fixation was performed in 2% glutaraldehyde with  
465 2% PFA in 100 mM sodium cacodylate buffer at 4 °C overnight. Sample was washed  
466 3 times with 100 mM cacodylate buffer and secondary fixation was performed with 1%  
467 osmium in 100 mM cacodylate buffer for 60 min at room temperature. Sample was washed  
468 twice in cacodylate buffer, twice in dd H<sub>2</sub>O and contrasted in 1% uranylacetate in dd H<sub>2</sub>O at  
469 4 °C overnight. Samples were washed in dd H<sub>2</sub>O twice and dehydrated in 30%, 50%,  
470 70%, 90%, 100% and 100% acetone for 10 minutes each. Sample was then embedded  
471 in Spurr resin (23,6% epoxy-cyclohexylmethyl-3,4-epoxy-cyclohexylcarboxylate  
472 (ERL), 14,2% ERL-4206 plasticizer, 61,3 nonenyl succinic anhydride, 0,9%  
473 dimethylethanolamine) and for this incubated in 25%, 50% and 75% 45 min at room  
474 temperature each and in 100% at 4 °C overnight. Embedding was finalized in BEEM  
475 capsules overnight at 60 °C. Samples were trimmed and cut into 70 nm thick sections.  
476 Electron microscopy was performed on a Joel JEM-1400 transmission microscope with  
477 a bottom mount 4k digital camera (F416, Tietz Video and Image Processing Systems  
478 GmbH, Gauting) with the assistance of Dr. Stefan Hillmer.

479

#### 480 **Acknowledgements**

481 We thank Rogerio Amino, Amanda Balaban, Carolina Thieleke-Matos and  
482 Photini Sinnis for fruitful discussions and comments on the manuscript, Markus  
483 Meissner for support, Miriam Reinig for mosquito production, Catherine Moreau for  
484 help with cloning and Jannik Traut for help with microscopy. The work was funded by  
485 the Human Frontier Science Program (RGY0071/2011), the Deutsche  
486 Forschungsgemeinschaft (DFG, German Research Foundation) – project number  
487 240245660 – SFB 1129 and the European Research Council (ERC StG 281719). FF is  
488 a member of CellNetworks cluster of excellence at Heidelberg University. We  
489 acknowledge the microscopy support from the Infectious Diseases Imaging Platform  
490 (IDIP) at the Center for Integrative Infectious Disease Research and thank Stefan  
491 Hillmer and Stephanie Gold from the Electron Microscopy Core Facility of Heidelberg  
492 University for support and the use of their microscopes.

493

494 References:

495

- 496 1. Aliprandini, E., Tavares, J., Panatieri, R. H., Thiberge, S., Yamamoto, M. M.,  
497 Silvie, O., . . . Amino, R. (2018). Cytotoxic anti-circumsporozoite antibodies

- 498 target malaria sporozoites in the host skin. *Nature Microbiology*, 3(11):1224-  
499 1233. doi:10.1038/s41564-018-0254-z  
500
- 501 2. Aly, A. S. I., Matuschewski, K. (2005). A malarial cysteine protease is  
502 necessary for Plasmodium sporozoite egress from oocysts. *The Journal of*  
503 *Experimental Medicine*, 202(2):225-30. doi:10.1084/jem.20050545.  
504
- 505 3. Amino, R., Thiberge, S., Martin, B., Celli, S., Shorte, S., Frischknecht, F.,  
506 Ménard, R. (2006). Quantitative imaging of Plasmodium transmission from  
507 mosquito to mammal. *Nature Medicine*, 12(2):220-4. doi:10.1038/nm1350  
508
- 509 4. Aurrecochea, C., Brestelli, J., Brunk, B. P., Dommer, J., Fischer, S., Garjria,  
510 B., . . . Wang, H. (2009) PlasmoDB: a functional genomic database for malaria  
511 parasites. *Nucleic Acids Research*, 37(Database issue):D539-43. doi:  
512 10.1093/nar/gkn814.  
513
- 514 5. Burda, P., Schaffner, M., Kaiser, G., Roques, M., Zuber, B., Heussler, V. T.  
515 (2017). A Plasmodium plasma membrane reporter reveals membrane  
516 dynamics by live-cell microscopy. *Scientific Reports*, 7(1):9740.  
517 doi:10.1038/s41598-017-09569-4.  
518
- 519 6. Casares, S., Brumeanu, T., Richie, T. L. (2010). The RTS,S malaria vaccine.  
520 *Vaccine*, 28(31):4880-94. doi:10.1016/j.vaccine.2010.05.033.  
521
- 522 7. Cerami, C., Frevert, U., Sinnis, P., Takacs, B., Clavijo, P., Santos, M. J.,  
523 Nussenzweig, V. (1992). The basolateral domain of the hepatocyte plasma  
524 membrane bears receptors for the circumsporozoite protein of Plasmodium  
525 falciparum sporozoites. *Cell*, 70(6):1021-33. doi:10.1016/0092-  
526 8674(92)90251-7  
527
- 528 8. Coppi, A., Natarajan, R., Pradel, G., Bennett, B. L., James, E. R., Roggero, M.  
529 A., . . . Sinnis, P. (2011). The malaria circumsporozoite protein has two  
530 functional domains, each with distinct roles as sporozoites journey from  
531 mosquito to mammalian host. *The Journal of Experimental Medicine*,  
532 208(2):341-56. doi:10.1084/jem.20101488.  
533
- 534 9. Dound, M. B., Koksal, A. C., Mi, L., Song, G., Lu, C., Springer, T. A. (2012).  
535 Unexpected fold in the circumsporozoite protein target of malaria vaccines.  
536 *PNAS*, 109(20):7817-22. doi:10.1073/pnas.1205737109.  
537
- 538 10. Engstler, M., Thilo, L., Weise, F., Grünfelder, C. G., Schwarz, H., Boshart,  
539 M., Overath, P. (2004). Kinetics of endocytosis and recycling of the GPI-  
540 anchored variant surface glycoprotein in Trypanosoma brucei. *The Journal of*  
541 *Cell Science*, 117(Pt 7):1105-15. doi:10.1242/jcs.00938.  
542
- 543 11. Ferguson, D. J. P., Balaban, A. E., Patzewitz, E., Wall, R. J., Hopp, C. S.,  
544 Poulin, B., . . . Tewari, R. (2014). The repeat region of the circumsporozoite  
545 protein is critical for sporozoite formation and maturation in Plasmodium.  
546 *PLoS One*, 9(12):e113923. doi:10.1371/journal.pone.0113923.  
547



- 548 12. Frischknecht, F., Matuschewski, K. (2017). *Plasmodium* Sporozoite Biology.  
549 *Cold Spring Harbor Perspectives in Medicine*, 7:a025478  
550 doi:10.1101/cshperspect.a025478  
551
- 552 13. Frischknecht, F., Baldacci, P., Martin, B., Zimmer, C., Thiberge, S., Olivo-  
553 Marin, C., Shorte, S. L., Ménard, R. (2004). Imaging movement of malaria  
554 parasites during transmission by Anopheles mosquitoes. *Cellular*  
555 *Microbiology*, 6(7):687-94. doi:10.1111/j.1462-5822.2004.00395.x.  
556
- 557 14. Hegge, S., Uhrig, K., Streichfuss, M., Kynast-Wolf, G., Matuschewski, K.,  
558 Spatz, J. P., Frischknecht, F. (2012). Direct manipulation of malaria parasites  
559 with optical tweezers reveals distinct functions of Plasmodium surface  
560 proteins. *ACS nano*, 6(6):4648-62. doi:10.1021/nn203616u  
561
- 562 15. Hegge, S., Münter, S., Steinbüchel, M., Heiss, K., Engel, U., Matuschewski,  
563 K., Frischknecht, F. (2010). Multistep adhesion of Plasmodium sporozoites.  
564 *The FASEB Journal*, 24(7):2222-34. doi:10.1096/fj.09-148700.  
565
- 566 16. Hereld, D., Krakow, J. L., Bangs, J. D., Hart, G.W., Englund, P. T. (1986). A  
567 phospholipase C from Trypanosoma brucei which selectively cleaves the  
568 glycolipid of the variant surface glycoprotein. *The Journal of biological*  
569 *chemistry*, 261(29):13813-9.  
570
- 571 17. Hiss, J. A., Przyborski, J. M., Schwarte, F., Lingelbach, K., Schneider, G.  
572 (2008). The Plasmodium export element revisited. *PLoS One*, 3(2):e1560.  
573 doi:10.1371/journal.pone.0001560.  
574
- 575 18. Janse, C. J., Ramesar, J., Waters, A. P. (2006) High-efficiency transfection  
576 and drug selection of genetically transformed blood stages of the rodent  
577 malaria parasite Plasmodium berghei. *Nature Protocols*, 1(1):346-56.  
578 doi:10.1038/nprot.2006.53.  
579
- 580 19. Kehrer, J., Singer, M., Lemgruber, L., Silva, P. A. G. C., Frischknecht, F.,  
581 Mair, G. R. (2016). A Putative Small Solute Transporter Is Responsible for the  
582 Secretion of G377 and TRAP-Containing Secretory Vesicles during  
583 Plasmodium Gamete Egress and Sporozoite Motility. *PLoS Pathogens*,  
584 12(7):e1005734. doi:10.1371/journal.ppat.1005734.  
585
- 586 20. Kennedy, M., Fishbaugher, M. E., Vaughan, A. M., Patrapuvich, R., Boonhok,  
587 R., Yimamnuaychok, N., . . . Lindner, S. E. (2012). A rapid and scalable  
588 density gradient purification method for Plasmodium sporozoites. *Malaria*  
589 *Journal*, 11:421. doi:10.1186/1475-2875-11-421.  
590
- 591 21. Kaiser, G., De Niz, M., Zuber, B., Burda, P., Kornmann, B., Heussler, V. T.,  
592 Stanway, R. R. (2016). High resolution microscopy reveals an unusual  
593 architecture of the Plasmodium berghei endoplasmatic reticulum. *Molecular*  
594 *Microbiology*, 102(5):775-791. doi:10.1111/mmi.13490.  
595
- 596 22. Kisalu, N. K., Idris, A. H., Weidle, C., Flores-Garcia, Y., Flynn, B. J., Sack, B.  
597 K., . . . Seder, R. A. (2018). A human monoclonal antibody prevents malaria

- 598 infection by targeting a new site of vulnerability on the parasite. *Nat Medicine*,  
599 24(4):408-416. doi:10.1038/nm.4512  
600
- 601 23. Klug, D., Goellner, S., Kehrer, J., Sattler, J., Strauss, L., Singer, M., . . .  
602 Frischknecht, F. (2020). Evolutionarily distant I domains can functionally  
603 replace the essential ligand-binding domain of Plasmodium TRAP. *eLife*,  
604 9:e57572. doi: 10.7554/eLife.57572.  
605
- 606 24. Klug, D., Frischknecht, F. (2017). Motility precedes egress of malaria oocysts.  
607 *eLife*, 6:e19157. doi:10.7554/eLife.19157.  
608
- 609 25. Kruzel, E. K., Zimmerert 3<sup>rd</sup>, G. P., Bangs, J. D. (2017). Life Stage-Specific  
610 Cargo Receptors Facilitate Glycosylphosphatidylinositol-Anchored Surface  
611 Protein Transport in *Trypanosoma brucei*. *mSphere*, 2(4):e00282-17.  
612 doi:10.1128/mSphere.00282-17.  
613
- 614 26. Kono, M., Heincke, D., Wilcke, L., Wong, T. W. Y., Bruns, C., Herrmann, S.,  
615 Spielmann, T., Gilberger, T. W. (2016). Pellicle formation in the malaria  
616 parasite. *The Journal of Cell Science*, 129(4):673-80. doi:10.1242/jcs.181230.  
617
- 618 27. Logan-Klumpler, F. J., De Silva, N., Boehme, U., Rogers, M. B., Velarde, G.,  
619 McQuillan, J. A., . . . Berriman, M. (2012). GeneDB—an annotation database  
620 for pathogens. *Nucleic Acids Research*, 40(Database issue):D98-108.  
621 doi:10.1093/nar/gkr1032.  
622
- 623 28. Lukinavicius, G., Reymond, L., D'Este, E., Masharina, A., Göttfert, F., Ta, H.,  
624 . . . Johnsson, K. (2014). Fluorogenic probes for live-cell imaging of the  
625 cytoskeleton. *Nature Methods*, 11(7):731-3. doi:10.1038/nmeth.2972.  
626
- 627 29. Lukinavicius, G., Umezawa, K., Olivier, N., Honigmann, A., Yang, G., Plass,  
628 T., . . . Johnsson, K. (2013). A near-infrared fluorophore for live-cell super-  
629 resolution microscopy of cellular proteins. *Nature Chemistry*, 5(2):132-9.  
630 doi:10.1038/nchem.1546.  
631
- 632 30. Meis, J. F., Verhave, J. P., Jap, P. H., Meuwissen, J.H. (1985). Fine structure  
633 of exoerythrocytic merozoite formation of Plasmodium berghei in rat liver.  
634 *The Journal of Protozoology*, 32(4):694-9. doi:10.1111/j.1550-  
635 7408.1985.tb03104.x.  
636
- 637 31. Ménard, R., Sultan, A. A., Cortes, C., Altszuler, R., van Dijk, M. R., Janse,  
638 C.J., . . . Nussenzweig, V. (1997). Circumsporozoite protein is required for  
639 development of malaria sporozoites in mosquitoes. *Nature*, 385(6614):336-40.  
640 doi:10.1038/385336a0.  
641
- 642 32. Münter, S., Sabass, B., Selhuber-Unkel, C., Kudryashv, M., Hegge, S., Engel,  
643 U., . . . Frischknecht, F. (2009). Plasmodium sporozoite motility is modulated  
644 by the turnover of discrete adhesion sites. *Cell Host Microbe*, 6(6):551-62.  
645 doi:10.1016/j.chom.2009.11.007.  
646



- 647 33. Petersen, T. N., Brunak, S., von Heijne, G., Nielsen, H. (2011). SignalIP 4.0:  
648 discriminating signal peptide from transmembrane regions. *Nature Methods*,  
649 8(10):785-6. doi:10.1038/nmeth.1701.  
650
- 651 34. Pierleoni, A., Martelli, P. L., Casadio, R. (2008). PredGPI: a GPI-anchor  
652 predictor. *BMC Bioinformatics*, 9:392. doi:10.1186/1471-2105-9-392.  
653
- 654 35. Prudêncio, M., Rodriguez, A., Mota, M. M. (2006). The silent path to thousands  
655 of merozoites: the Plasmodium liver stage. *Nat Reviews Microbiology*,  
656 3(11):849-56. doi:10.1038/nrmicro1529  
657
- 658 36. Rottmann, M., McNamara, C., Yeung, K. S., Lee, M. C. S., Zou, B., Russel,  
659 B., . . . Diagona, T. T. (2010). Spiroindolones, a potent compound class for the  
660 treatment of malaria. *Science*, 329(5996):1175-80.  
661 doi:10.1126/science.1193225.  
662
- 663 37. Sato, Y., Montagna, G. N., Matuschewski, K. (2014). Plasmodium berghei  
664 sporozoites acquire virulence and immunogenicity during mosquito hemocoel  
665 transit. *Infection and Immunity*, 82(3):1164-72. doi:10.1128/IAI.00758-13.  
666
- 667 38. Schindelin, J., Arganda-Carreras, I., Frise, E., Kaynig, V., Longair, M.,  
668 Pietzsch, T., . . . Cardona, A. (2012). Fiji: an open-source platform for  
669 biological-image analysis. *Nature Methods*, 9(7):676-82.  
670 doi:10.1038/nmeth.2019.  
671
- 672 39. Silva, P. A. G. C., Guerreiro, A., Santos, J. M., Braks, J. A. M., Janse, C. J.,  
673 Mair, G. R. (2016) Translational Control of UIS4 Protein of the Host-Parasite  
674 Interface is Mediated by the RNA Binding Protein Puf2 in Plasmodium  
675 berghei Sporozoites. *PLoS One*, 11(1):e0147940.  
676 doi:10.1371/journal.pone.0147940.  
677
- 678 40. Singer, M., Marshall, J., Heiss, K., Mair, G. R., Grimm, D., Mueller, A.,  
679 Frischknecht, F. (2015). Zinc finger nuclease-based double-strand breaks  
680 attenuate malaria parasites and reveal rare microhomology-mediated end  
681 joining. *Genome Biology*, 16:249. doi:10.1186/s13059-015-0811-1.  
682
- 683 41. Singh, A. P., Buscaglia, C. A., Wang, Q., Levay, A., Nussenzweig, D. R.,  
684 Walker, J. R., . . . Nussenzweig, V. (2007). Plasmodium circumsporozoite  
685 protein promotes the development of the liver stages of the parasite. *Cell*,  
686 131(3):492-504. doi:10.1016/j.cell.2007.09.013.  
687
- 688 42. Spreng, B., Fleckstein, H., Kübler, P., Biagio, C. D., Benz, M., Patra, P., . . .  
689 Frischknecht, F. (2019). Microtubule number and length determine cellular  
690 shape and function in Plasmodium. *The EMBO Journal*, 38(15):e100984.  
691 doi:10.15252/embj.2018100984.  
692
- 693 43. Swearingen, K. E., Lindner, S. E., Shi, L., Shears, M. J., Harupa, A., Hopp, C.  
694 S., . . . Sinnis, P. (2016) Interrogating the Plasmodium Sporozoite Surface:  
695 Identification of Surface-Exposed Proteins and Demonstration of

- 696 Glycosylation on CSP and TRAP by Mass Spectrometry-Based Proteomics.  
697 *PLoS Pathogens*, 12(4):e1005606. doi:10.1371/journal.ppat.1005606.  
698
- 699 44. Terzakis, J. A., Sprinz, H., Ward, R. A. (1966). Sporoblast and sporozoite  
700 formation in *Plasmodium gallinaceum* infection of *Aedes aegypti*. *Military*  
701 *medicine*, 131(9):Suppl:984-92.  
702
- 703 45. Terzakis, J. A., Sprinz, H., Ward, R. A. (1967). The transformation of the  
704 *Plasmodium gallinaceum* oocyst in *Aedes aegypti* mosquitoes. *Journal of Cell*  
705 *Biology*, 34(1):311-26. doi:10.1083/jcb.34.1.311.  
706
- 707 46. Thaty, V., Fujioka, H., Gantt, S., Nussenzweig, R., Nussenzweig, V.,  
708 Ménard, R. (2002). Levels of circumsporozoite protein in the *Plasmodium*  
709 oocyst determine sporozoite morphology. *The EMBO Journal*, 21(7):1586-96.  
710 doi:10.1093/emboj/21.7.1586.  
711
- 712 47. Triggs, V. P., Bangs, J. D. (2003). Glycosylphosphatidylinositol-dependent  
713 protein trafficking in bloodstream stage *Trypanosoma brucei*. *Eukaryotic Cell*,  
714 2(1):76-83. doi:10.1128/ec.2.1.76-83.2003.  
715
- 716 48. Vanderberg, J. P. (1974) Studies on the motility of *Plasmodium* sporozoites.  
717 *The Journal of Protozoology*, 21(4):527-37. doi:10.1111/j.1550-  
718 7408.1974.tb03693.x.  
719
- 720 49. Wang, Q., Fujioka, H., Nussenzweig, V. (2005). Mutational analysis of the  
721 GPI-anchor addition sequence from the circumsporozoite protein of  
722 *Plasmodium*. *Cellular Microbiology*, 7(11):1616-26. doi:10.1111/j.1462-  
723 5822.2005.00579.x.  
724
- 725 50. Wang, Q., Fujioka, H., Nussenzweig, V. (2005). Exit of *Plasmodium*  
726 sporozoites from oocysts is an active process that involves the  
727 circumsporozoite protein. *PLoS Pathogens*, 1:e9. doi:  
728 10.1371/journal.ppat.0010009.  
729
- 730 51. Wong, T. C., Desser, S. S. (1976). Fine structure of oocyst transformation and  
731 the sporozoites of *Leucocytozoon dubreuilii*. *The Journal of Protozoology*,  
732 23(1):115-26. doi:10.1111/j.1550-7408.1976.tb05253.x.  
733
- 734 52. Yoshida, N., Nussenzweig, R. S., Potocnjak, P., Nussenzweig, V., Aikawa, M.  
735 (1980). Hybridoma produces protective antibodies directed against the  
736 sporozoite stage of malaria parasite. *Science*, 207(4426):71-3.  
737 doi:10.1126/science.6985745.  
738
- 739 53. Zhao, J., Bhanot, P., Hu J., Wang, Q. (2016). A Comprehensive Analysis of  
740 *Plasmodium* Circumsporozoite Protein Binding to Hepatocytes. *PLoS One*,  
741 11(8):e0161607. doi:10.1371/journal.pone.0161607.  
742  
743  
744  
745

746 Tables and Figures

747

748 Table 1 Infectivity of the different parasite lines

749

| Parasite line      | MGS     | HLS   | SGS    | HLS/MGS | SGS/MGS | # <sup>1</sup> |
|--------------------|---------|-------|--------|---------|---------|----------------|
| Wild type          | 77.000  | 3.400 | 18.000 | 0,03    | 0,2     | 68 (23)        |
| GFP-GPI            | 46.000  | 500   | 2.500  | 0,01    | 0,05    | 160 (97)       |
| SP-GFP-<br>CSP_add | 11.000  | 200   | 4.400  | 0,04    | 0,4     | 154 (119)      |
| SP-GFP-<br>CSP_rep | 120.000 | 200   | 10     | 0,005   | 0,0001  | 62 (36)        |
| R-GFP-CSP          | 29.000  | 100   | 1      | 0,003   | 0,00003 | 97 (97)        |
| TSR-GFP-<br>CSP    | 21.000  | 200   | 200    | 0,007   | 0,01    | 108 (58)       |

750 MGS: midgut derived sporozoites; HLS: hemolymph derived sporozoites, SGS:  
751 salivary gland derived sporozoites; orange and red numbers indicate small and large  
752 difference to wild type, respectively. Numbers determined from at least three  
753 dissections of at least two infection experiments.

754 <sup>1</sup>Number of infected mosquitoes analyzed for MGS and SGS as well as for (HLS)

755

756

**A**

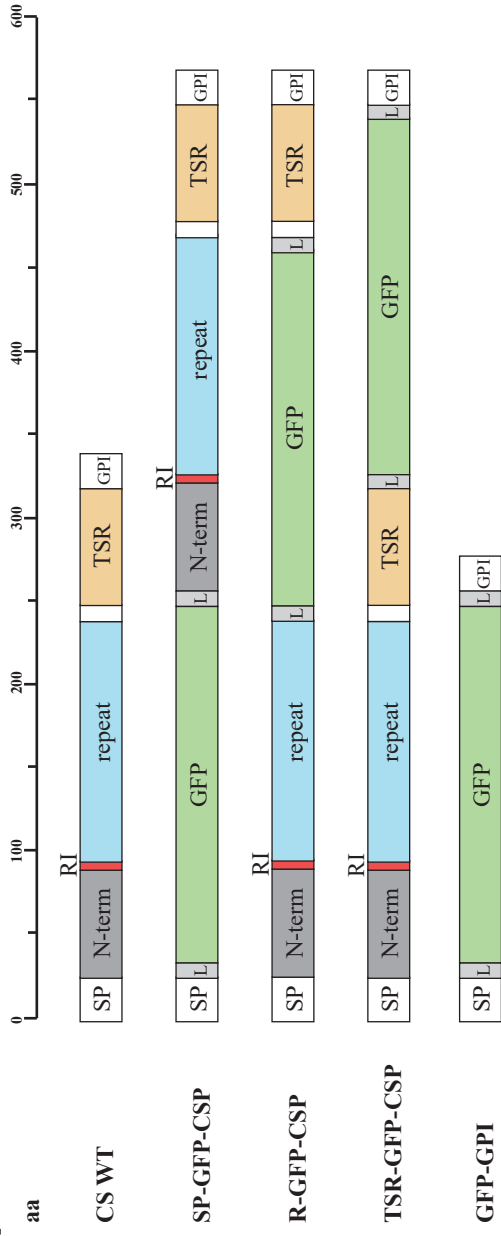

**B**

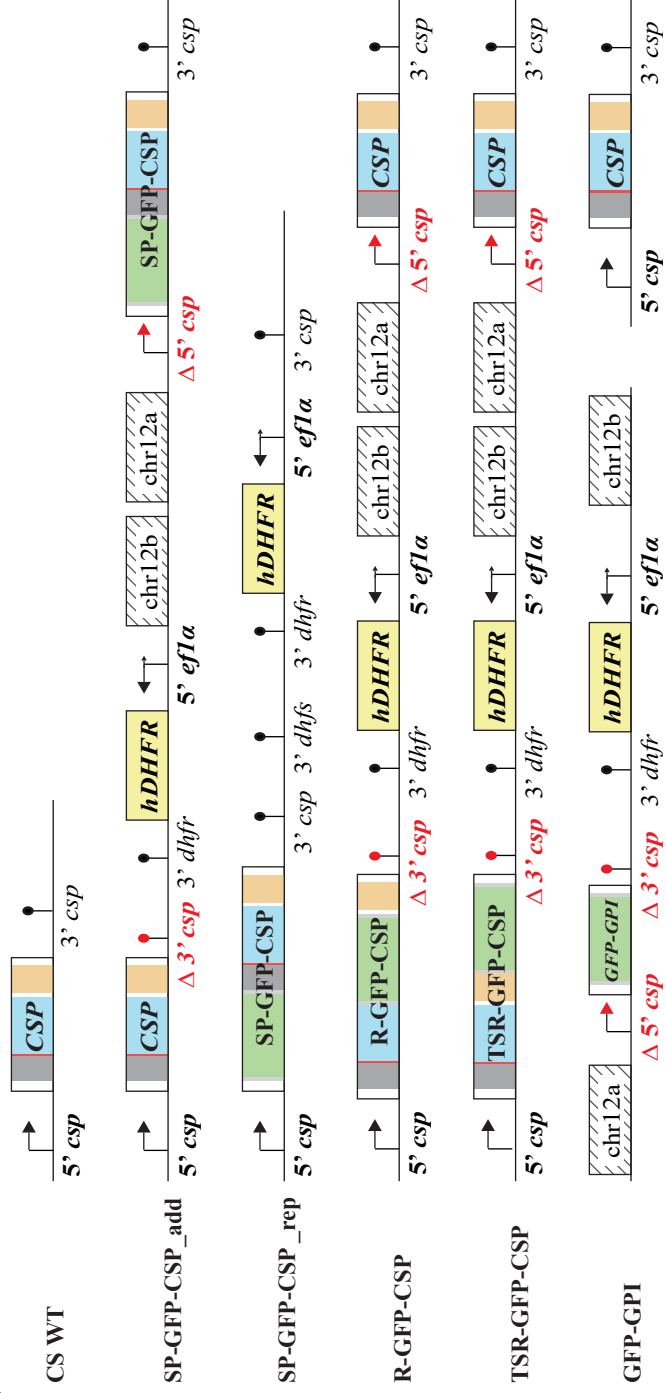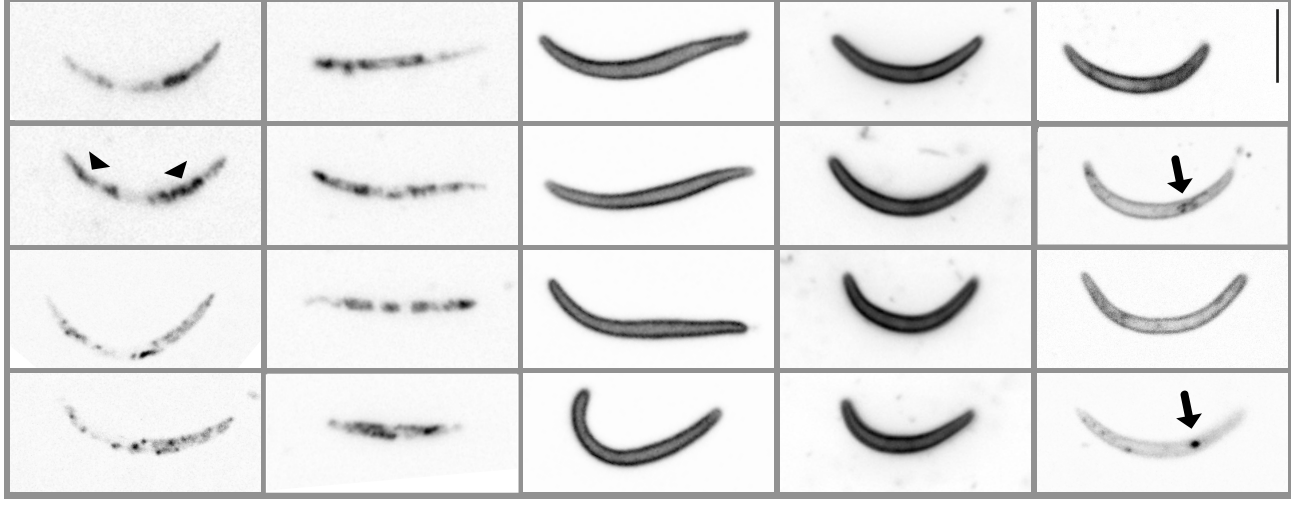

**C**

## Figure 1 Generation of GFP-CSP fusion lines

A: Cartoon version of the different GFP-CSP fusion proteins showing the respective size of all domains of the circumsporozoite protein (CS) and of all interdomain GFP tags generated. Sizes of respective parts of the proteins are indicated. GFP is directly flanked with a glycine linker (L).

B: Gene models of all generated lines. The *csp* locus is indicated for all parasite lines. For GFP-GPI, the *csp* locus is unchanged as the expressed construct is integrated in a silent locus on chromosome 12. Note that for GFP-GPI, both the promoter region  $\Delta 5'$  *csp* as well as  $\Delta 3'$  *csp* are truncated. In all other lines either the inserted GFP-CSP fusion (SP-GFP-CSP\_add) or the endogenous *csp* (R-GFP-CSP and TSR-GFP-CSP) show a shortened 5'UTR ( $\Delta 5'$  *csp*). The respective other gene features a shortened 3'UTR ( $\Delta 3'$  *csp*) courtesy of the insertion strategy. The SP-GFP-CSP\_rep parasite line shows the GFP-CSP fusion with the endogenous 5' and 3' UTRs.

C: Localization of fluorescence within free GFP-CSP expressing sporozoites. Note the vesicular pattern in the GFP-GPI (arrows) as well as the SP-GFP-CSP (arrowheads) parasite lines. For GFP-GPI, SP-GFP-CSP\_add and TSR-GFP-CSP salivary gland sporozoites are shown, for the others midgut sporozoites. The apical end of the sporozoite always points to the bottom. Scale bar: 5  $\mu$ m.



## Figure 2 Western blots reveal processing of GFP-CSP fusion proteins

A: Western blots using the 3D11 anti CSP repeats antibody and an anti GFP antibody on the different indicated parasite lines at day 10 or day 17 post infection. Parasites were purified using Accudenz (S) and the pellet (P) was loaded as comparison. Note that in the GFP-GPI and SP-GFP-CSP\_rep lines only the typical wild type bands of CSP are revealed by the 3D11 antibody, indicating that no fusion protein is present. In contrast bands corresponding to fusion proteins are readily detectable in the R-GFP-CSP and TSR-GFP-CSP lines (arrows). Note the different degradation products, indicating processing of these GFP-CSP proteins (stars). Arrowheads indicate free or GPI-anchored GFP. Cleavage products shown in B are indicated by small numbers.

B: Cartoon illustrating the likely processing events leading to the different bands observed in panel A. Known processing sites after the signal peptide and within region I (RI) are indicated by arrows. Resulting products detectable by anti CSP repeat antibody for CSP WT (1 and 2) and TSR-GFP-CSP (3 and 4, also detectable by anti GFP antibody) are indicated below and also shown in A. Processing/degradation near the linker regions and also between the repeat and TSR region are also indicated (5,6 and 7).



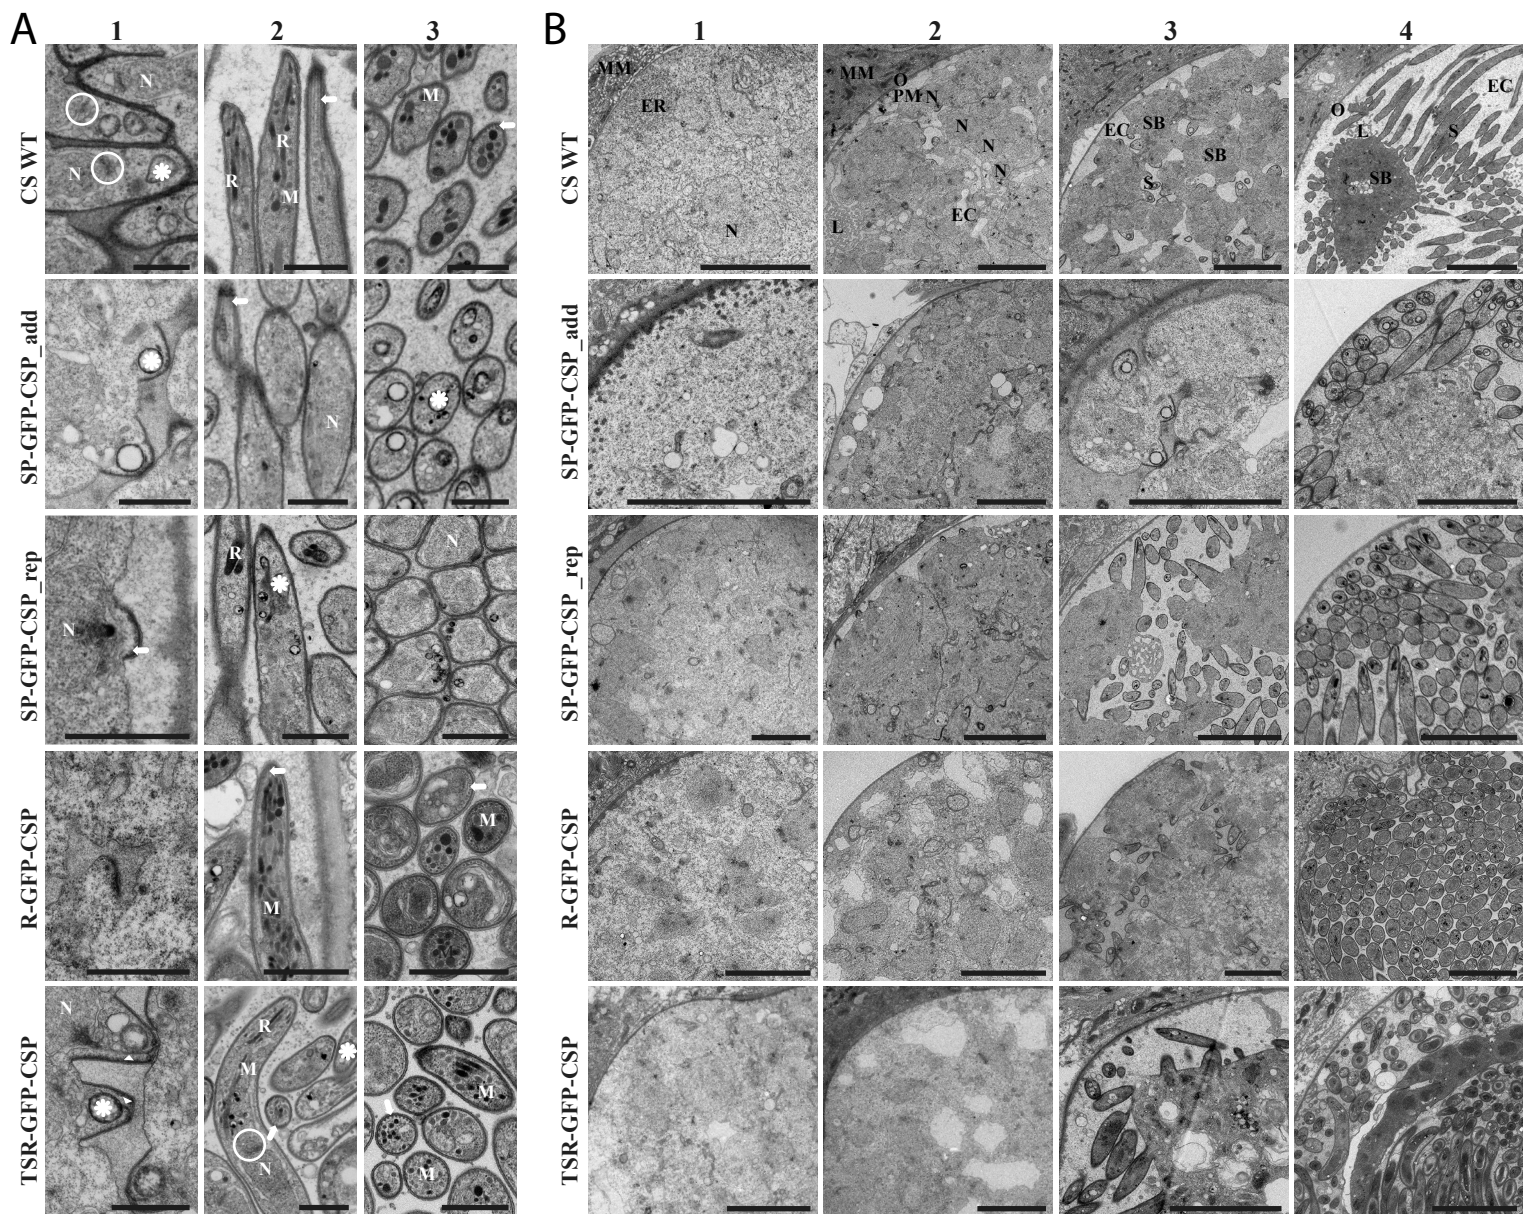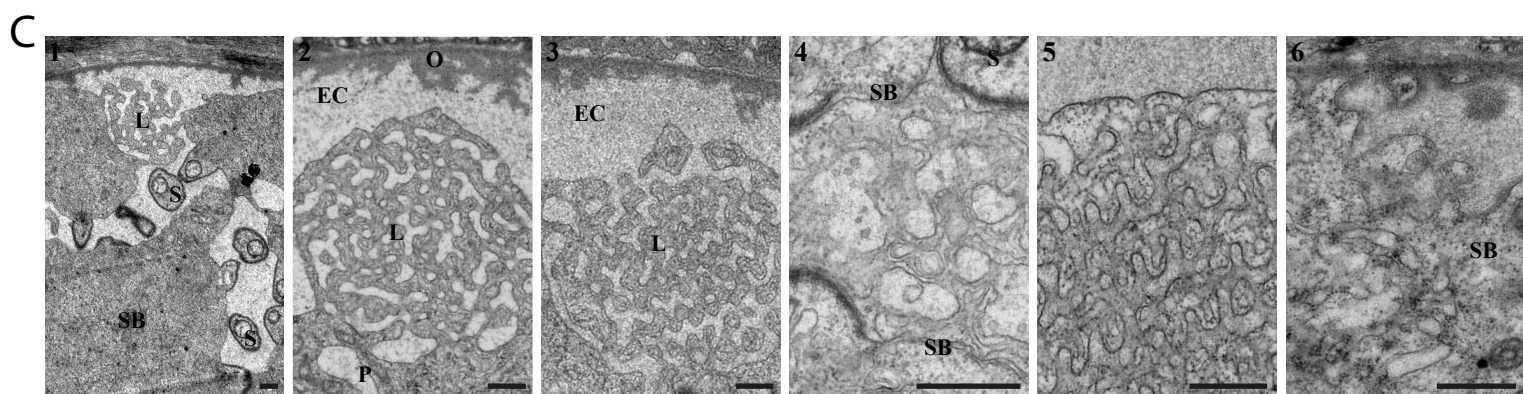



### **Figure 3** Electron micrographs show normal sporozoite development

Detail (A) and overview (B) transmission electron micrographs from oocysts at different stages of development from the different parasite lines.

A: Sporozoites during the process of budding and in longitudinal and cross sections of the indicated parasite lines. Note the rhoptry Anlagen (asterisks), nuclei (N), micronemes (M), rhoptries (R) and microtubules (arrow) as well as the thickened pellicle (caused by the underlying IMC) during early budding. Arrowheads indicate possible rootlet fibers linking the apical tip and the nucleus. ER exit sites are always located at the apical end of the nucleus (ring). Scale bars: 1  $\mu$ m.

B: Oocysts from the different indicated parasite lines shown as quarters from oocyst wall to oocyst center to optimize overview while preserving detail. Early to late oocysts are shown from 1 to 4. MM: mosquito midgut, ER: endoplasmic reticulum, N: nucleus, O: oocyst wall, L: labyrinthine structure, EC: extracellular cavity, S: sporozoite, SB: sporoblast. Scale bars: 5  $\mu$ m

C: Labyrinthine structures (L) seen in wild type (1-3) and all generated parasite lines (4: SP-GFP-CSP\_rep, 5: R-GFP-CSP, 6: TSR-GFP-CSP. EC: extracellular cavity, O: oocyst wall, S: sporozoite, P: plasma membrane, SB: sporoblast. Scale bar: 500 nm.

A

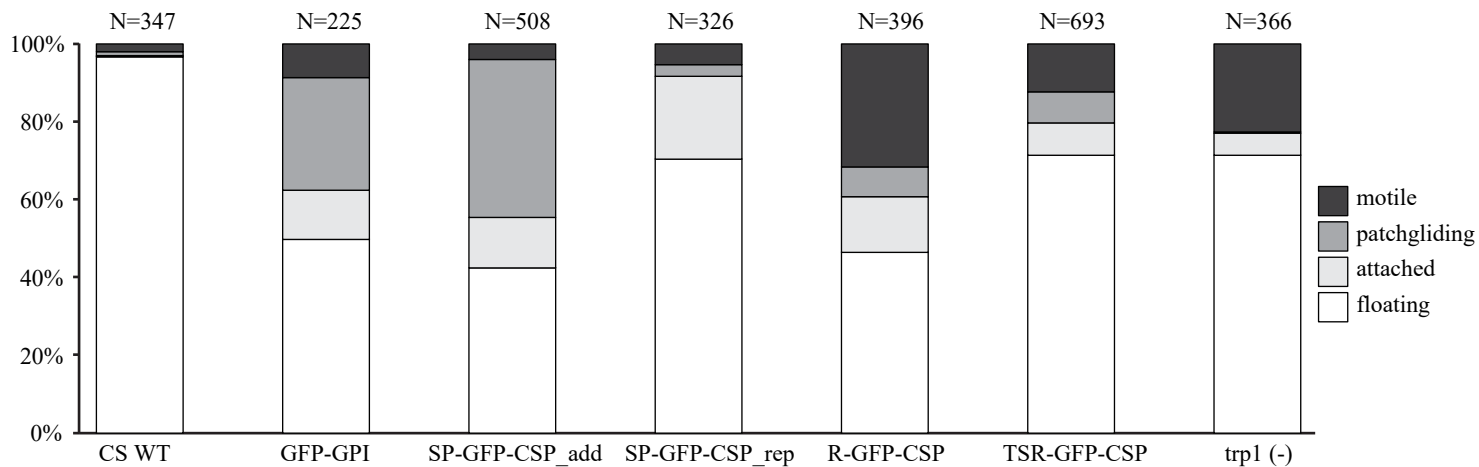

B

| <i>Parasite line</i> | <i>sporozoite dose injected IV</i> | <i>infected mice / total mice</i> |
|----------------------|------------------------------------|-----------------------------------|
| CS WT                | 500.000 MGS                        | 3/4                               |
| SP-GFP-CSP_rep       | 1.000.000 MGS                      | 0/2                               |
| SP-GFP-CSP_rep       | 500.000 MGS                        | 0/2                               |
| R-GFP-CSP            | 500.000 MGS                        | 0/4                               |

**Figure 4** Gliding motility and infectivity to mice.

A: Gliding motility of midgut derived CSP mutants. Midgut derived sporozoites were analyzed for gliding motility and classified into motile (> 30  $\mu$ m traveled within 180 seconds), patch gliding (back and forward motion over a single attachment site), attached or floating. The number of analyzed sporozoites is indicate on top of the graph. Parasites lacking TRP1 (trp1 (-)) (Klug and Frischknecht, 2017) were analyzed for comparison. Samples were derived from mosquito midguts day 25 post infection and imaged after Accudenz purification. SP-GFP-CSP\_rep was derived at day 18 post infection as they degenerated thereafter within the cysts.

B: Infectivity of midgut sporozoites (day 22/23 post infection) inoculated intravenously into mice. Parasitemia was monitored from day 3 until day 20.

GFP-GPI

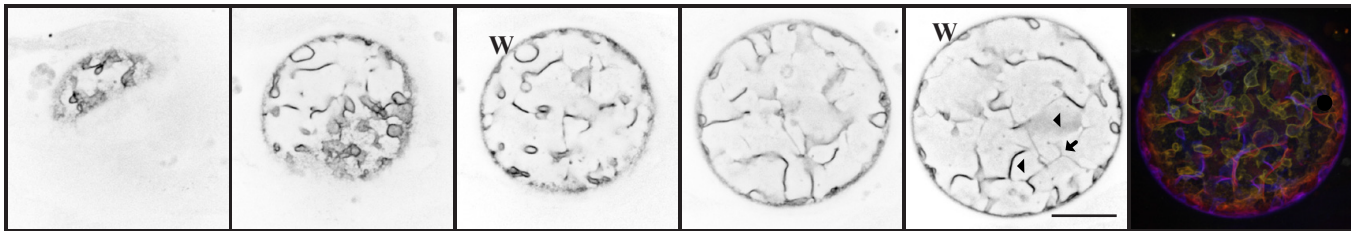

SP-GFP-CSP\_add

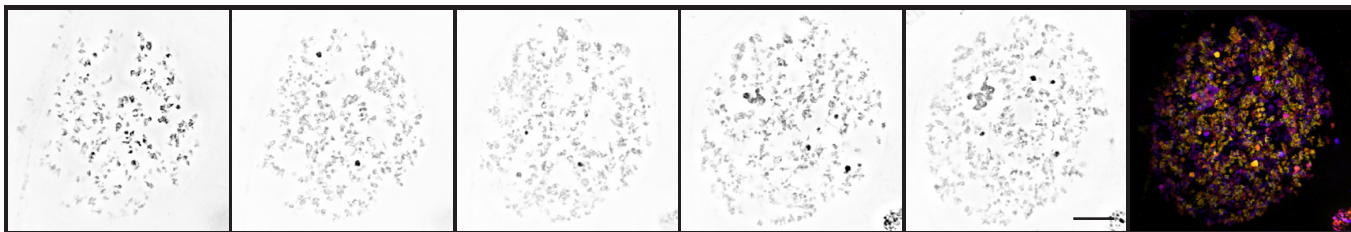

SP-GFP-CSP\_rep

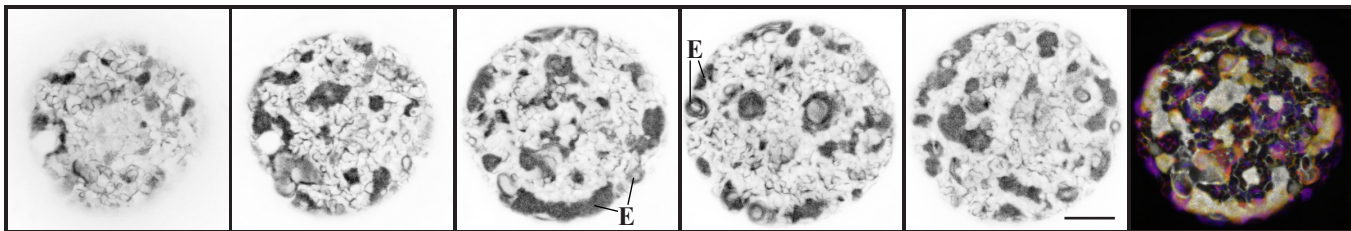

R-GFP-CSP

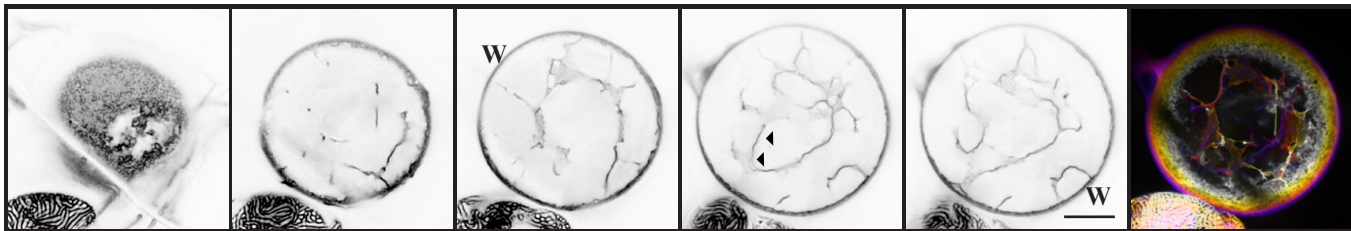

TSR-GFP-CSP

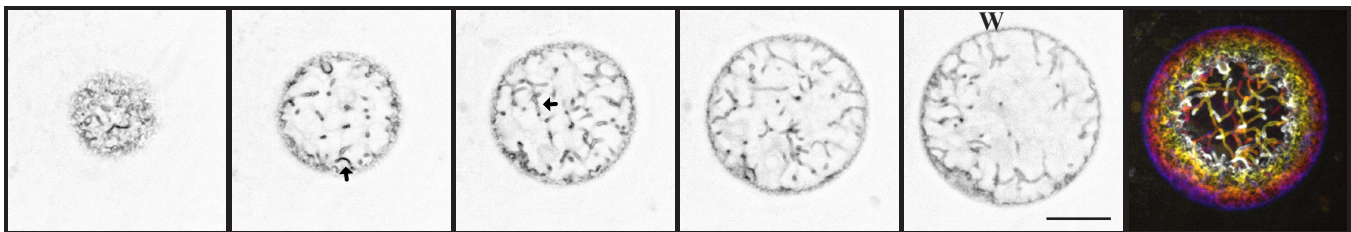

**Figure 5** Early oocyst development.

Tubular (arrows) and sheet-like (arrowheads) invaginations revealed during early invagination from the different indicated parasite lines. Orthogonally optically sectioned sheet-like invaginations show an apparent stronger signal. Individual panels show inverted fluorescent confocal sections and the merge shows a depth encoded 3D reconstruction of the z-stack. Oocyst of SP-GFP-CSP\_add do not express GFP at the early oocyst stage, so Hoechst stained DNA is shown. Note the signal at (underneath) the oocyst wall (marked with W) and fluorescent accumulation in ER like structures (marked with E). Scale bars: 10  $\mu\text{m}$ .



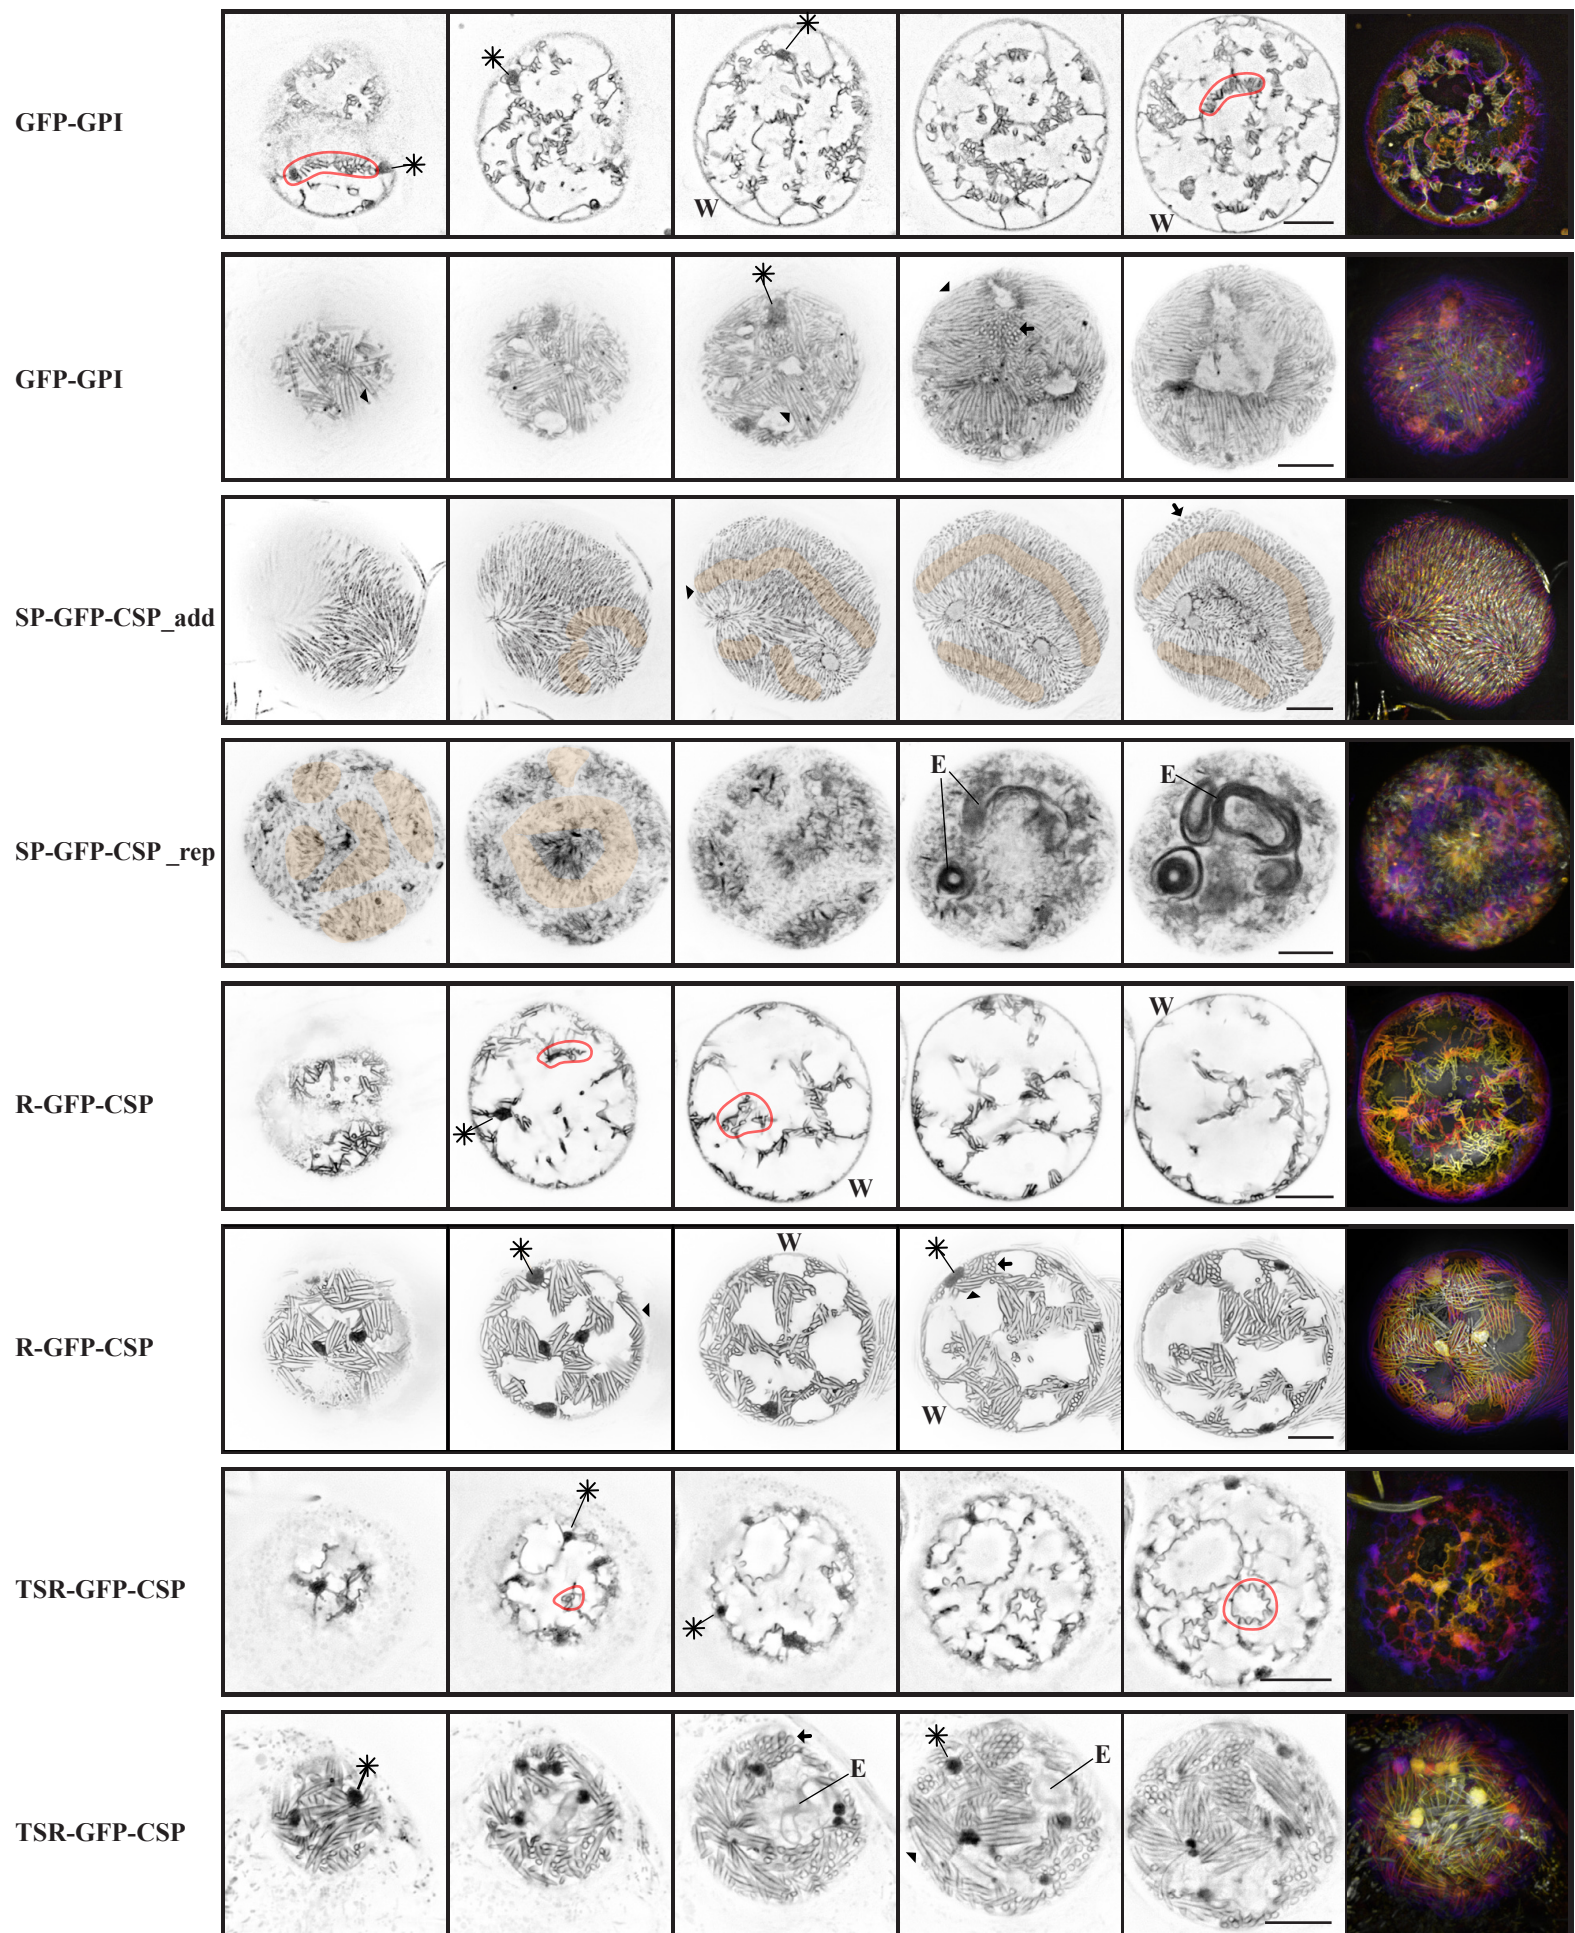

**Figure 6** Oocysts during sporozoite formation.

Early and advanced sporozoite formation from invaginations of the different indicated parasite lines. Individual panels show inverted fluorescent confocal sections and the merge shows a depth encoded 3D reconstruction of the z-stack. Note the cross (arrows) and longitudinal (arrowheads) sections through sporozoites and the non-membranous pattern in the SP-GFP-CSP parasite lines (nuclei of forming sporozoite indicated by orange shading). Large black dots (stars + line) likely correspond to labyrinthine structures. Note the signal at (underneath) the oocyst wall (marked with W) and fluorescent accumulation in ER like structures (marked with E). Exemplary areas of initiation of sporozoite apical tip formation resulting in plasma membrane curvature are circled in red. Scale bars: 10  $\mu\text{m}$ .



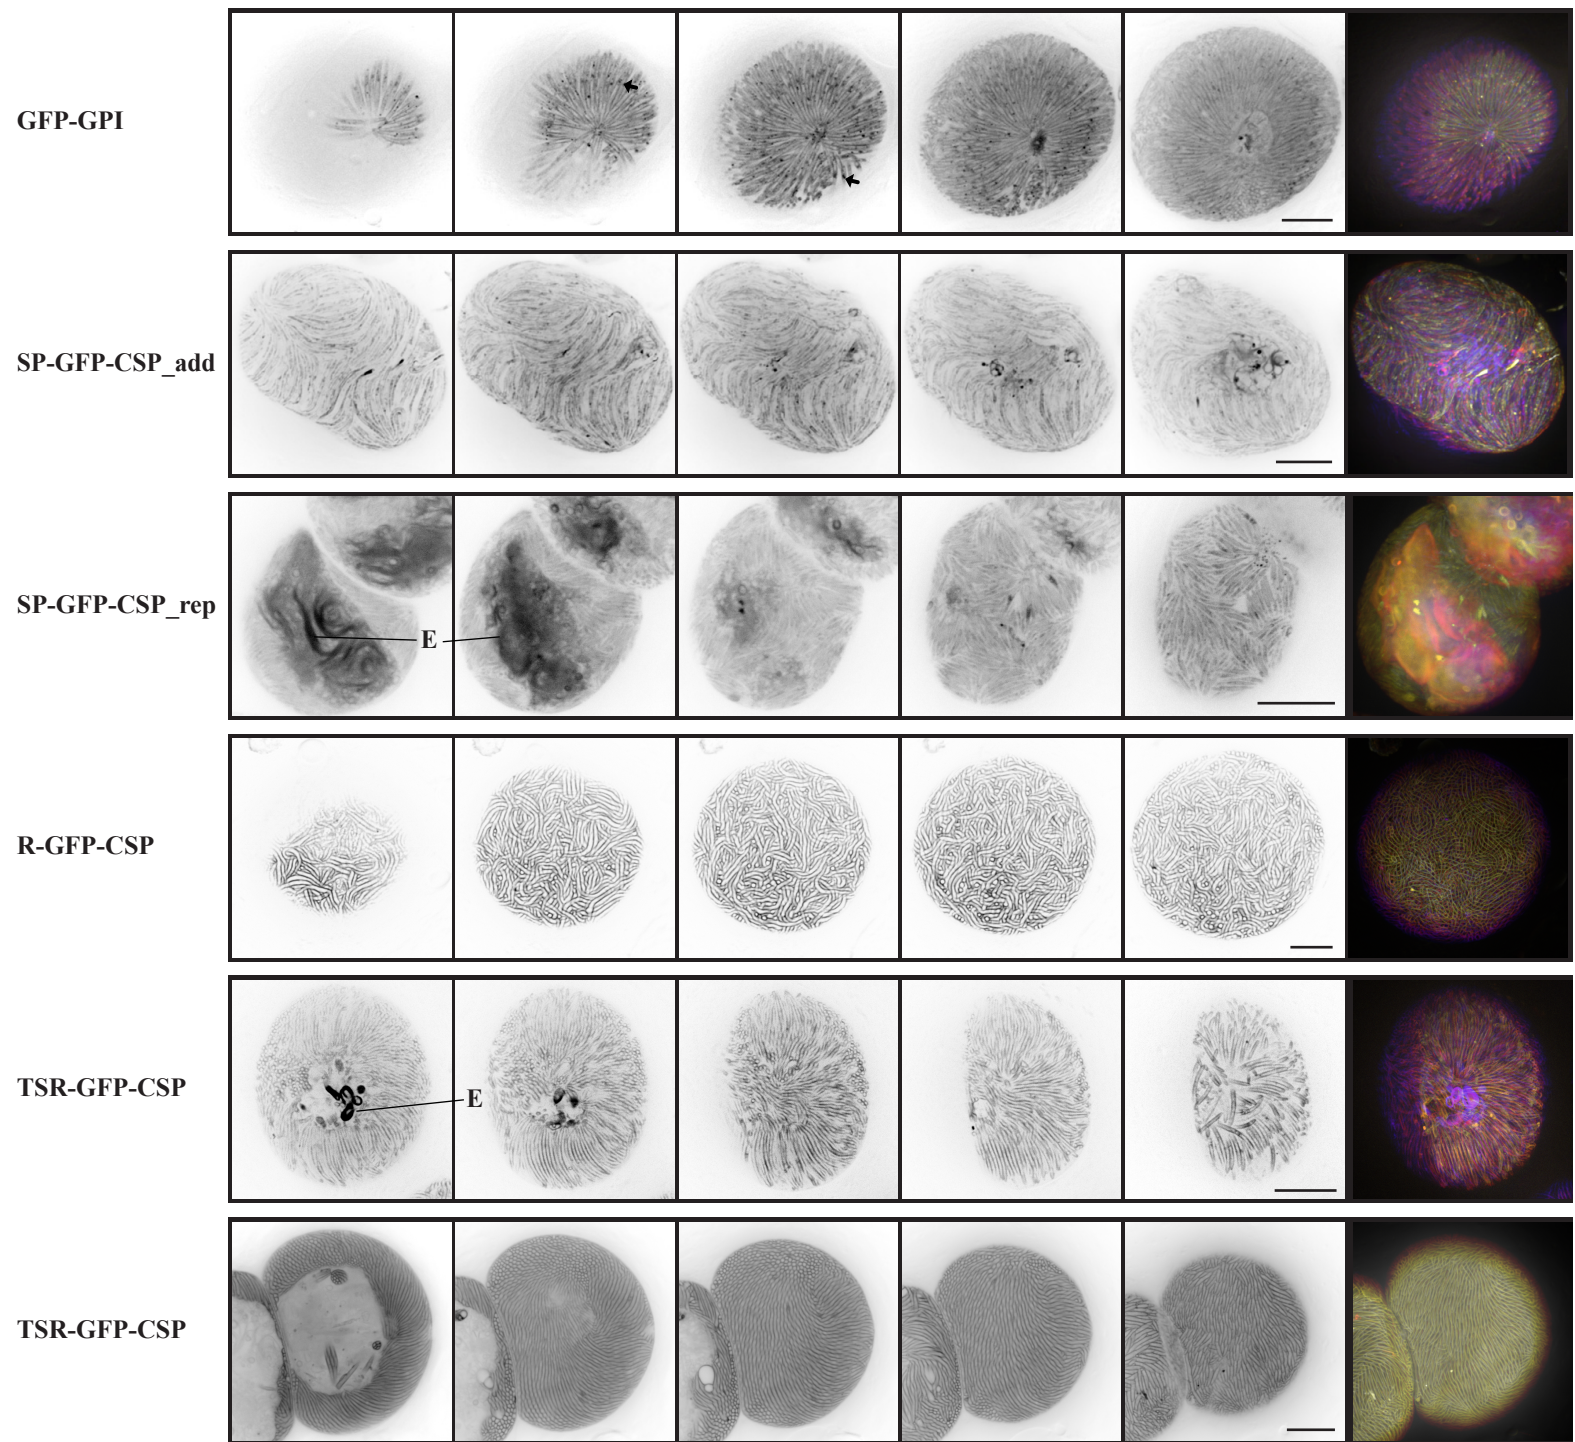



**Figure 7** Oocysts with mature sporozoites.

Fully formed sporozoites nearly fill the entire oocyst. Individual panels show inverted fluorescent confocal sections and the merge shows a depth encoded 3D reconstruction of the z-stack. Arrows point to examples of accumulations of signal within the GFP-GPI sporozoites. Note the different pattern in the SP-GFP-CSP parasite lines and that the SP-GPF-CSP\_rep example shows a not completely developed oocyst with fluorescent accumulation in ER like structures (marked with E). Scale bars: 10  $\mu$ m.

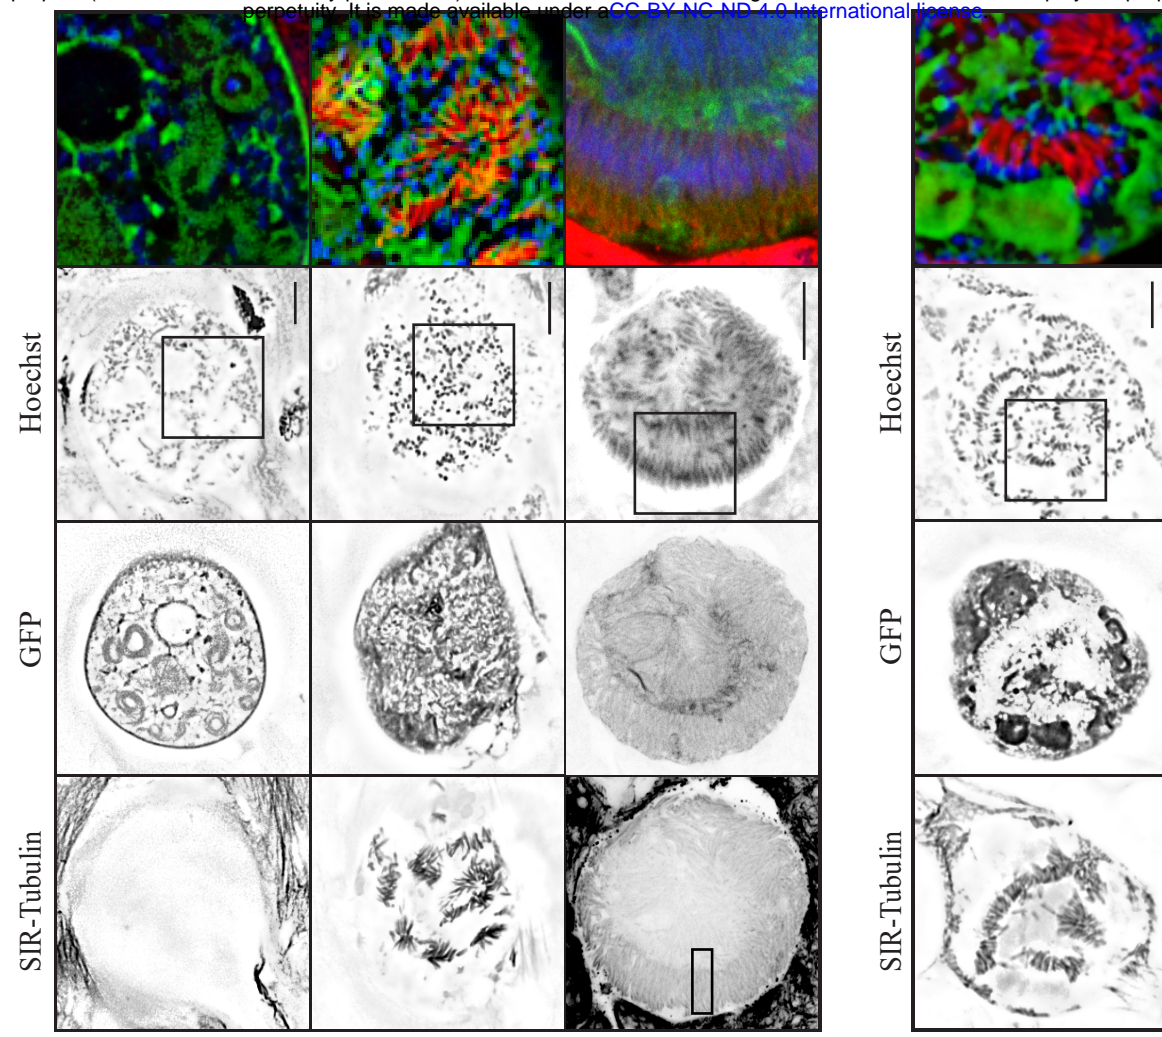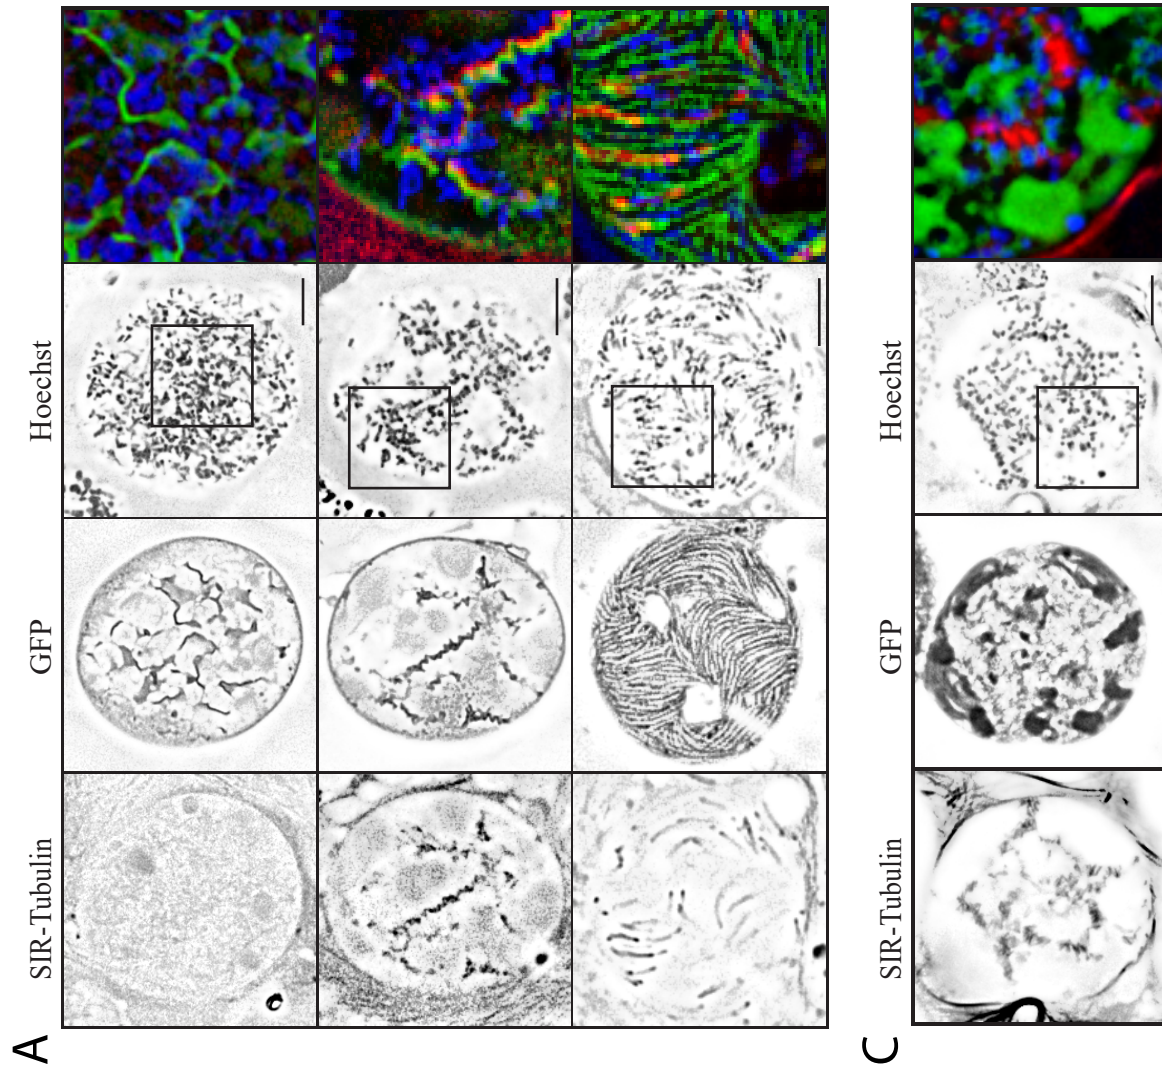

**Figure 8** Microtubules form after initial bud formation.

A-C: Example images of confocal sections at different stages of selected parasites lines show microtubules (red – SiR tubulin), nuclei (blue – Draq594) and the indicated GFP-CSP fusions. Note that nuclei align at the plasma membrane prior to microtubule assembly, while microtubules are found at highly curved membranes corresponding to budding sporozoites. Scale bar: 10  $\mu$ m.

A: Oocysts of R-GFP-CSP. B: Oocysts of TSR-GFP-CSP. Last row: fixed and stained for tubulin with anti-Tubulin antibody.

C: Oocysts of SP-GFP-CSP\_rep parasite line.

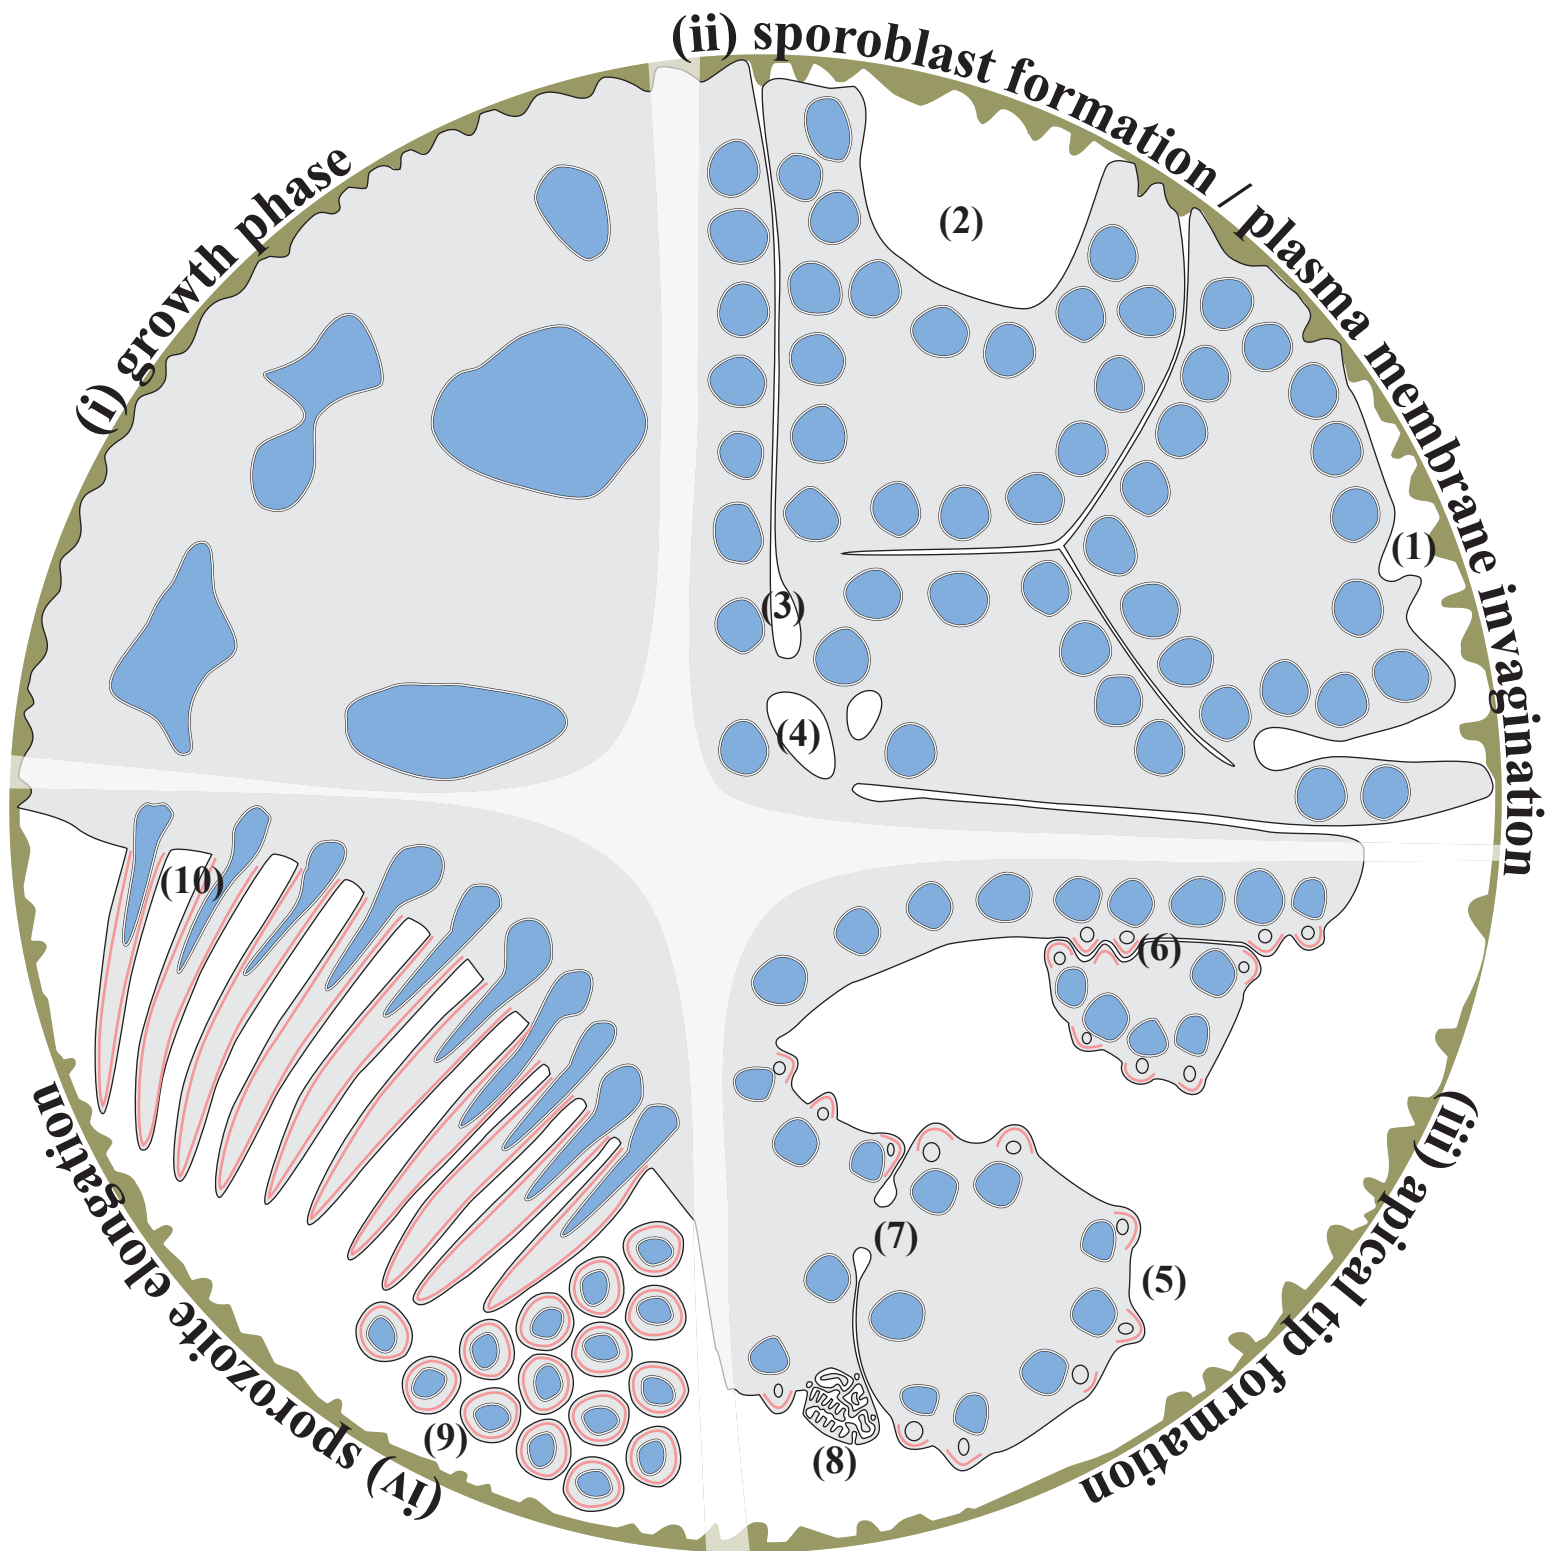

## Figure 9 Model of Oocyst development.

Oocyst development can be separated into four phases. (i) Growth phase: After rounding up of the ookinete a strong increase in cell size, genome replication and oocyst wall (brown) formation occurs. (ii) Plasma membrane invagination and sporoblast formation: nuclear division to many and small nuclei (blue) coincides with the retraction of the plasma membrane (PM) (black) from the oocyst wall (1 and 2) and deep invaginations of the PM (3). The nuclei collect underneath the PM. Internal membrane structures spread towards and fuse with the PM (4). (iii) Apical tip formation: Between the PM and the underlying nuclei the apical tip of forming sporozoites is initiated, visible by formation of inner membrane complex (IMC) directly accompanied by microtubules (together shown in red). This is followed by the appearance of the rhoptry Anlagen (circle) and a bulging PM. This can occur outside of sporoblasts (5) as well as in between sporoblasts (6). Note the cytoplasmic bridges in between sporoblasts (7) and labyrinthine structures at the periphery of sporoblasts, frequently located in between them (8). (iv) Sporozoite elongation: During the last stage of sporozoite development prior to egress, sporozoites elongate by uniform retraction of or pushing through the PM. The “end” of the forming IMC and microtubules (red) always coincides with the deepest PM invagination. At this time sporozoites are in similar orientation than sporozoites in their local environment (9 and 10) until they separate from the remaining sporoblast.
